# Supplementary material
Source: MDPI journal article supplement (https://www.mdpi.com/2071-1050/10/3/764)
Supplement: s1 [file s1]

## Sheet: Original data
YEAR	DMU	GDP	WATER	GAS	SOLID	CO2	CAPITAL	LABOR	ENERGY
2011	1	11602.6	143493	2039	34987.6	4.77479e+08	4085.58	520.98	11566.5
2011	2	4816.6	8172	1342	124	4.39635e+07	4350.62	110.98	3934.36
2011	3	3510.23	22643	2865	69085	4.09655e+06	724.435	65.2	1920.7
2011	4	2021.56	51181	243	37418.6	2.09359e+06	467.963	53.37	1146.53
2011	5	2495.49	6191	613	3736.6	1.22854e+07	286.683	53.53	1173.91
2011	6	26340.3	138116	5473	1986.5	3.33441e+07	2350.67	360.71	2663.79
2011	7	10820.7	51950	2351	610.1	2.30996e+07	1073.69	176.86	1517.97
2011	8	10259.2	71664	2218	1006.4	1.55982e+07	1096.23	136.76	1197.41
2011	9	6500.86	2090	542	57.5	2.13217e+06	363.524	19.93	272.309
2011	10	25181	240802	4342	673.3	4.38801e+07	2598.18	588.83	6269.05
2011	11	12323.4	19878	643	46.6	4.11829e+06	732.439	382.41	753.437
2011	12	7784.45	25785	409	63.6	1.34133e+06	410.772	259.75	371.367
2011	13	7507.19	3522	3258	344.4	8.41567e+06	578.819	128.68	1097.31
2011	14	4443.42	735	285	12.6	669697	315.831	106.42	201.995
2011	15	10869.5	382265	17094	2482.5	8.66116e+07	1607.25	146.75	3983.51
2011	16	3747.53	1303	251	22.3	639199	441.868	70.98	389.602
2011	17	2756.67	1937	217	6.1	298419	206.102	110.32	232.757
2011	18	15099.9	79587	21762	3950.6	1.85092e+09	2742.31	96.12	17057
2011	19	42050.7	288331	31205	26547.7	4.30799e+08	6303.54	454.86	34713.1
2011	20	13592.2	48586	3604	308.9	1.51274e+07	1287.2	178.6	1523.16
2011	21	4906.25	41428	2069	365.3	1.29641e+07	609.573	46.27	1530.4
2011	22	5390.39	12155	4129	208.4	9.10808e+06	658.323	93.53	1521.16
2011	23	12748.3	26075	767	74.5842	6.88812e+06	1153.85	254.19	2016.73
2011	24	31927.7	121037	129851	5945.5	4.86564e+08	4515.4	517.03	30015
2011	25	41943.9	33545	173215	42344.2	5.81467e+08	7152.36	339.92	58896.6
2011	26	18122.6	29912	31892	10303.9	1.21004e+08	2886.14	192.62	13991.1
2011	27	18444.8	11973	8871	472.2	5.56386e+06	1564.65	311.51	3533.37
2011	28	36220.7	6454	1631	211.1	7.91916e+06	2924.76	494.52	3823.13
2011	29	23139.9	15069	3071	150.9	1.10021e+07	1901.36	323.41	1887.05
2011	30	64053.8	13326	5946	573.8	1.58856e+07	4492.21	579.48	3995.63
2011	31	42234.9	9631	1523	67.3	1.01803e+07	2805.85	599.61	2276.48
2011	32	82242.9	44961	6153	96.7	3.31969e+06	3990.07	819.48	2623.39
2011	33	8143.7	2242	101	4.5	436703	471.825	124.49	318.389
2011	34	39130.9	158928	202906	61060.6	3.31378e+09	20140.2	252.6	24372.1
2011	35	2123.58	989	261	68	1.9655e+07	539.089	19.86	604.709
2011	36	846.893	3559	7	10.3	846113	1135.21	36.63	1036.08
2010	1	9777.29	104765	2324	27316.1	4.48612e+08	3718.17	527.19	10574.4
2010	2	4616.05	11554.6	1026	206.606	4.47691e+07	3927.87	106.06	4057.55
2010	3	3002.75	15352.5	2472	31968.9	4.30495e+06	565.661	67.04	1573.35
2010	4	1754.55	38851.6	469	29338.4	1.92426e+06	423.172	55.4	954.16
2010	5	2189.28	7683.1	861	1780.21	11793312	271.179	56.54	1026.38
2010	6	23059.3	143100	4154	2119.71	3.29619e+07	2185.11	369.01	2644.27
2010	7	9290.73	54549	3270	668.433	2.35281e+07	1008.55	175.88	1508.52
2010	8	8285.93	75519.2	3097	929.09	15393653	1033.12	130.02	1130.42
2010	9	5598.01	2672.7	505	40.6658	1.56504e+06	354.038	21.1	228.89
2010	10	24422.9	245470	3258	753.788	5.07743e+07	2581.44	647.32	6204.53
2010	11	11635.8	12038.6	176	56.0429	4538327	728.276	447	748.42
2010	12	7199.03	28173.3	176	74.6666	1458019	387.153	276.37	392.19
2010	13	6418.94	5036	1567	209.724	8.39776e+06	548.601	142.29	1035.62
2010	14	3946.23	2146	134	17.9011	662977	293.525	111.73	209.66
2010	15	9669.86	393699	7697	2321.34	8.30136e+07	1541.54	157.91	3961.92
2010	16	3522.7	1578.2	110	13.1385	883322	474.671	85.06	390.97
2010	17	2790.95	1070.8	53	4.06951	352576	215.537	128.11	210.84
2010	18	13750.1	70024.3	18712	3512.61	1.75068e+09	2589.47	92.15	16582.7
2010	19	36362.9	309006	25741	14359.1	3.82008e+08	5813.21	474.14	29688.9
2010	20	10948.4	52605.5	1603	405.615	1.39469e+07	1236.27	173.17	1427.68
2010	21	4083.24	42370.5	2767	460.551	1.14263e+07	572.916	43.93	1440.91
2010	22	4776.74	7042.4	1021	140.778	9.8691e+06	616.87	102.93	1461.17
2010	23	11879.3	4962.2	767	74.5842	7.36289e+06	1130.66	283.3	2097.51
2010	24	27253	32313.1	87263	5160.6	456603813	4082.93	544.61	27683.2
2010	25	37263.9	116948	122928	38007.9	5.47388e+08	7001.11	345.63	57533.7
2010	26	16033.1	31118.2	24299	8791.1	1.10974e+08	2628.03	191.59	12841.5
2010	27	16561.1	30151.5	2077	364.147	6.2066e+06	1474.12	344.64	3627.75
2010	28	31869.8	13055.1	2430	573.23	8.53609e+06	2754.86	539.38	3270.81
2010	29	19364.4	9714.4	1939	211.214	1.22985e+07	1747.89	334.22	1851.2
2010	30	56356.3	26219.4	4184	561.799	1.68366e+07	4148.15	573.72	3748.85
2010	31	36716.7	11652.4	1063	80.5185	5.01877e+06	2518.49	604.3	2121.53
2010	32	69632.7	35965.2	6369	166.343	3.73188e+06	3908.39	772.75	2525.15
2010	33	6810.9	4965.3	555	30.5899	505149	442.99	124.86	346.47
2010	34	34033.4	129624	182550	53823.1	2.93358e+09	19626.2	275.64	22584.1
2010	35	1769.37	1931.4	834	73.3358	26250743	504.021	19.02	650.11
2010	36	840.58	31189.1	11	21.9363	1.29639e+06	1172.7	45.92	970.36
2009	1	7976.21	80235.5	2334	23868.6	3.92456e+08	3269.59	505.54	10206.5
2009	2	4821.81	10197.5	1092	175.482	4.61152e+07	3459.41	102.38	3945.9
2009	3	2235.48	15546.2	1489	23441.8	3.25328e+06	461.382	57.48	1250.9
2009	4	1546.63	37307.3	359	25847.9	1.82761e+06	361.793	50.04	832.89
2009	5	1733.65	7718.52	834	1454.59	1.28217e+07	244.611	55.11	1095.77
2009	6	19480.5	143838	3682	2090.56	3.24448e+07	1890.28	337.66	2795.37
2009	7	7795.92	52699.1	3198	531.941	2.03412e+07	908.342	162.7	1563.34
2009	8	6954.81	69673.6	2110	930.034	1.58264e+07	929.763	119.02	1191.44
2009	9	4739.15	3252.79	517	40.6869	1.73995e+06	328.713	20.03	233.8
2009	10	21358.4	239116	3448	732.452	4.71931e+07	2467.53	617.04	6251.01
2009	11	10019.4	14727.6	227	46.9269	4.26609e+06	692.078	449.31	713.08
2009	12	5955.09	24964.3	333	80.4446	1.66373e+06	362.351	257.57	384.48
2009	13	5077.63	6137.25	1489	170.025	8.57475e+06	496.816	130.67	1049.09
2009	14	3110.5	1855.89	120	15.7702	585827	268.248	98.56	183.81
2009	15	7923.31	392604	6106	1938.67	7.76756e+07	1433	152.64	4101
2009	16	2958.46	1783.47	135	15.8211	776186	444.659	82.13	357.48
2009	17	2398.08	1238.52	83	2.99685	345354	205.354	122.36	214.62
2009	18	11906.4	66406.3	15804	2994.4	1.5615e+09	2149.71	84.95	15328.3
2009	19	30247.7	297062	23174	12595.5	3.80492e+08	5061	440.49	28946.1
2009	20	9090.92	52718.4	1287	345.92	1.35661e+07	1122.3	160.48	1354.58
2009	21	3599.71	43854.8	3233	373.017	1.45229e+07	572.786	41.45	1436.85
2009	22	4000.76	6783.47	905	138.716	8.8237e+06	569.713	97.97	1344.72
2009	23	9607.7	4387.48	657	65.6689	7.14821e+06	1044.95	259.81	1894.96
2009	24	21560	32777.1	78873	4358.57	4.61583e+08	3577.96	508.91	26882.3
2009	25	32920	125978	103583	33893.7	5.15012e+08	6156.49	323.02	56404.4
2009	26	13750.1	28976	19456	7087.27	5.99836e+07	2303.39	177.64	11401.4
2009	27	13446.8	31345.8	1935	505.837	6.54951e+06	1296.34	319.31	3037.78
2009	28	24845.1	13452.3	1931	488.591	8.37801e+06	2375.93	486.52	2985.24
2009	29	15256.3	11006.4	4178	186.81	1.12819e+07	1530.55	309.24	1671.52
2009	30	42550.3	27421.8	3668	505.787	1.66603e+07	3601.7	498.33	3031.9
2009	31	29496.9	9324.47	1102	71.2951	7.49414e+06	2169.11	535	1854.48
2009	32	55511.5	33513.3	3387	172.548	3.69276e+06	3491.46	663.64	2216.28
2009	33	5363.93	5798.16	541	26.1046	495721	394.064	112.61	291.92
2009	34	28614.2	149010	143624	45131.2	2.81063e+09	17815.2	277.62	19574.9
2009	35	1409.37	2013.13	764	55.6012	2.4336e+07	439.208	18.09	566.25
2009	36	789.316	22919	7	19.424	551965	1068.53	45.14	874.91
2008	1	7244.51	72209	2452	19571	3.55101e+08	2821	502.38	9356.17
2008	2	4496.77	11209	894	145	4.73745e+07	2990.95	112.76	4210.04
2008	3	1642.92	16859	2225	22424	3.5289e+06	357.104	61.52	1408.03
2008	4	1332.84	42764	622	23589	1.85655e+06	300.414	53.53	863.14
2008	5	1377.3	9309	809	1388	1.17291e+07	218.044	54.23	1028.27
2008	6	16001.8	157770	3458	2005	3.18274e+07	1595.44	315.07	2731.34
2008	7	6597.64	47833	1813	533	2.08214e+07	808.136	154.57	1544.66
2008	8	5859.35	70840	1505	881	1.66384e+07	826.402	113.04	1161.85
2008	9	4341.11	2917	508	50	1.84825e+06	303.389	19.77	232.6
2008	10	19548.9	230362	3368	790	4.90538e+07	2353.62	652.06	6396.38
2008	11	9044.19	15244	275	65	4.45847e+06	655.88	458.7	725.34
2008	12	5359.9	26112	416	66	1.66169e+06	337.548	273.3	388.73
2008	13	4185.71	4653	1197	170	8.53702e+06	445.03	131.3	981.91
2008	14	2791.79	1825	226	18	658511	242.97	104.41	181.801
2008	15	7129.22	407675	5319	1800	7.48114e+07	1324.46	151.92	3998.65
2008	16	2669.83	1702	98	11	814718	414.647	82.03	349.806
2008	17	2285.46	1273	35	4	356632	195.17	132.72	219.762
2008	18	11426.3	70496	14231	4439	1.4603e+09	1709.94	86.02	13747
2008	19	24507.4	301935	21800	12064	3.8092e+08	4308.78	429.64	28961.1
2008	20	7592.49	47960	1451	353	1.39507e+07	1008.33	150.75	1360.49
2008	21	3377.32	48087	2687	339	1.50146e+07	572.657	45.06	1448.58
2008	22	3533.01	6447	783	115	8.92095e+06	522.557	97.29	1335.83
2008	23	8330.48	4842	1043	83	6.08007e+06	959.247	255.42	1852.37
2008	24	18153.3	35840	68149	3944	4.48181e+08	3072.99	498.73	25460.5
2008	25	28981.8	144104	110593	31459	4.67941e+08	5311.87	313.5	51862.9
2008	26	11680.3	30175	20563	7197	6.41246e+07	1978.76	185.18	11288
2008	27	12162.7	28252	2159	322	6.68686e+06	1118.57	327.17	3023.79
2008	28	22114.5	14291	2243	392	8.58356e+06	1997.01	493.21	2758.11
2008	29	13204.5	10513	657	124	1.07356e+07	1313.21	308.43	1630.28
2008	30	34014.1	28524	4033	524	1.645e+07	3055.24	473.14	2732.58
2008	31	25269.2	9927	1037	69	3.53519e+06	1819.73	527.79	1791.1
2008	32	52354.4	31862	3236	160	3.7382e+06	3074.53	677.31	2197.44
2008	33	5212.32	5756	660	41	521273	345.139	116.48	284.976
2008	34	26330.7	181627	121906	41726	2.65164e+09	16004.2	259.41	18676.5
2008	35	1179.29	2605	558	156	2.22436e+07	374.395	18.17	634.6
2008	36	734.379	27495	73	60	683648	964.364	43.78	834.111
2007	1	5867.32	73039.7	2361.2	18751.6	3.20231e+08	2350.01	463.69	7170.75
2007	2	4293.83	9987.95	981.4	184.163	4.51701e+07	2561.59	90.67	3677.49
2007	3	1222.98	16031.6	1387.2	21571.3	2.34978e+06	257.263	49.14	1313.84
2007	4	1171.53	43373.6	658.8	21044.2	1.76886e+06	232.998	55.11	820.251
2007	5	1116.56	8663.41	1085.2	1571.7	1.13358e+07	174.17	46.62	946.929
2007	6	13390.1	148589	3025.2	1732.4	2.46835e+07	1300.42	264.8	2335.75
2007	7	5605.41	42823.7	1440.9	460.623	1.69299e+07	697.083	135.03	1322.19
2007	8	4940.61	63156.4	2191.7	808.307	1.35044e+07	749.535	101.02	979.851
2007	9	3670.91	2873.2	480	47.4293	1.89913e+06	301.437	18.61	230.186
2007	10	17368.3	225169	3576	660.37	4.6394e+07	2224.63	626.26	6207.57
2007	11	7440.88	14493.9	163	50.7513	4.16453e+06	569.824	414.19	676.268
2007	12	4811.3	23573.7	261.2	62.0578	1.64289e+06	305.09	256.98	375.327
2007	13	3193.77	4825.46	2063.4	160.41	6.98838e+06	347.367	106.18	828.881
2007	14	2276.77	1848.22	343.7	21.3286	505958	234.255	91.3	147.815
2007	15	6057.7	424597	6405.3	1796.65	6.55213e+07	1220.06	138.3	3342.68
2007	16	2160.13	1964.1	74.3	10.3303	707530	385.493	72.38	323.534
2007	17	1956.59	929.371	31.8	3.59836	323740	174.412	119.32	207.681
2007	18	10844.5	73126.4	12187.9	2407.14	1.41798e+09	1643.8	80.64	13176.5
2007	19	21506.7	324026	30591.6	11784.5	3.12977e+08	3865.47	380.28	27245.3
2007	20	6363.7	42893.3	1139.7	316.905	1.13078e+07	956.21	137.34	1183.14
2007	21	3484.43	48957	3080.9	354.724	1.64642e+07	605.228	45.3	1553.97
2007	22	3034.6	6434.57	785.4	111.773	7.23224e+06	480.199	87.51	1259.12
2007	23	7016.1	4147.66	1011.8	74.0266	4.38286e+06	852.932	224.05	1625.99
2007	24	14552	40264.9	67783.7	4164.36	3.32627e+08	2619.67	448.41	20354.8
2007	25	26149	156862	86921.5	29797.4	4.36457e+08	4816.59	304.43	47774.4
2007	26	9733.26	31806.6	18625.7	6308.94	5.1177e+07	1601.64	156.27	10686.4
2007	27	9884.21	33335.3	2289.1	402.715	5.15788e+06	898.344	273.48	2832.47
2007	28	17288	12182.4	1257.3	216.919	6.72132e+06	1573.22	420.71	2586.52
2007	29	9951.25	9439.08	602.1	130.188	9.17081e+06	1050.88	256.51	1441.14
2007	30	28076.2	22047.6	3990	390.337	1.45298e+07	2655.41	408.59	2376.95
2007	31	20155.7	8659.56	773.3	57.9535	2.73812e+06	1535	449.15	1543.42
2007	32	45965.4	29621.1	2349.7	121.622	2.59006e+06	2826.75	587.92	2007.02
2007	33	4516.16	7194.64	747.1	33.0105	387819	309.9	106.97	259.092
2007	34	23608.1	174796	125480	37585.5	2.55846e+09	14613	256.96	18474.6
2007	35	819.375	2836.54	362.8	133.041	2.87135e+07	353.61	15.88	616.404
2007	36	660.07	15931.7	7.4	8.32559	593602	935.247	41.36	801.729
2006	1	4770.39	54023	2276	19352	2.78507e+08	2057.38	463.66	6786.54
2006	2	4072.99	11177	1000	119	4.38293e+07	2444.2	93.33	3626.2
2006	3	878.959	15431	1098	13680	2.16499e+06	200.32	45.27	1111.95
2006	4	963.517	42296	553	18339	1.76283e+06	191.069	45.31	719.149
2006	5	867.778	9842	1440	1170	1.03255e+07	162.341	44.2	896.742
2006	6	11249.4	94414	2367	1450	2.25814e+07	1133.2	238.6	2155.75
2006	7	4465.91	43113	1009	362	1.61543e+07	627.792	128.13	1256.07
2006	8	3835.96	56049	2250	811	1.30492e+07	686.895	92.26	948.612
2006	9	3136.94	2844	406	40	2.07953e+06	321.168	18.99	232.285
2006	10	14313.1	197934	3843	679	4.46211e+07	2054.58	615.43	5756.49
2006	11	6072.35	13685	211	64	3.97299e+06	492.336	377.57	622.677
2006	12	3967.47	20340	245	59	1.65414e+06	273.534	245.63	347.445
2006	13	2282.9	5223	881	134	6.86046e+06	298.768	91.62	767.11
2006	14	1794.55	931	287	33	505784	194.534	83.8	143.278
2006	15	4870.01	374407	5395	1596	6.46166e+07	1145.84	134.77	3443.68
2006	16	1749.58	1199	48	8	706285	369.073	68.97	295.197
2006	17	1664.43	883	27	4	323268	158.65	114.38	198.994
2006	18	9663.27	70281	10234	1779	1.31212e+09	1542.92	76.79	12360.1
2006	19	17034.2	335956	19258	10152	2.94669e+08	3461.07	357.78	24779
2006	20	5125.79	42988	885	258	1.1593e+07	906.22	130.28	1161.06
2006	21	2800.04	49543	3313	376	1.52305e+07	566.777	43.4	1423.97
2006	22	2473.32	5976	676	96	7.03536e+06	394.416	82.14	1180.25
2006	23	5623.51	3374	564	47	4.3959e+06	813.228	201.41	1557.66
2006	24	11105.1	43070	65132	4224	3.27123e+08	2405.23	426.39	19948.4
2006	25	21267	156727	73691	29149	4.10847e+08	4159.49	296.13	42812.3
2006	26	7953.48	32751	16744	5544	4.69257e+07	1357.7	136.82	8633.32
2006	27	7556.43	22448	1450	227	5.14188e+06	770.577	248.26	2576.02
2006	28	13061.4	12530	1160	205	6.92866e+06	1345.7	378.74	2335.61
2006	29	7584.28	11506	633	138	9.10706e+06	905.333	234.65	1344.21
2006	30	21101.4	25708	2888	572	1.42937e+07	2316.21	374.58	2134.25
2006	31	15807.7	8239	551	43	2.71942e+06	1324.2	403.98	1323
2006	32	37793.7	23905	2072	115	2.58104e+06	2426.76	505.07	1742.93
2006	33	3669.48	7845	494	46	386822	283.889	98.8	228.203
2006	34	19647.7	217145	101566	29135	2.33135e+09	12870.8	259.11	17416.9
2006	35	635.821	3278	736	112	2.76885e+07	315.382	14.54	646.265
2006	36	620.363	19747	32	14	597932	914.041	46.06	748.769
2005	1	3977.03	46650	1935	18248	2.53915e+08	1650.57	435.81	6916.95
2005	2	4046.85	11252	963	149	5.04671e+07	2118.72	85.58	3761.33
2005	3	606.488	14239	944	12728	2.17335e+06	158.284	40.59	946.09
2005	4	811.091	31136	598	16313	1.76866e+06	153.237	41.87	663.556
2005	5	653.651	12968	1273	1218	1.11289e+07	130.79	42.96	862.513
2005	6	9213.49	118964	2453	1317	2.23486e+07	968.244	222.55	2034.4
2005	7	3619.68	42830	930	431	1.58249e+07	550.88	121.02	1169.46
2005	8	3054.35	43404	836	675	1.32458e+07	630.5	89	879.567
2005	9	2786.42	2809	250	110	2.09868e+06	316.483	19.67	237.685
2005	10	12091	172232	3020	690	4.15147e+07	1853.9	590.96	4978.35
2005	11	4948.46	9185	350	30	3.72135e+06	424.887	346.06	546.821
2005	12	3350.18	18338	291	85	1.63039e+06	246.393	228.84	310.164
2005	13	1757.26	6569	901	155	6.76038e+06	260.825	83.33	690.706
2005	14	1364.23	797	314	42	505903	150.02	71.27	128.83
2005	15	4053.21	367422	4515	1243	5.87075e+07	1030.01	130.14	3274.13
2005	16	1476.36	1618	72	8	706619	344.917	66.9	274.466
2005	17	1422.42	862	40	9	323852	144.792	109.8	195.889
2005	18	9032.75	68122	9129	1841	1.15708e+09	1373.23	74.4	11881.9
2005	19	13682.5	339052	15887	9233	2.96884e+08	2861.88	339.99	22494.1
2005	20	4280.17	40050	1132	243	1.11373e+07	821.241	123.44	1122.39
2005	21	2305.7	48516	2886	342	1.50611e+07	534.712	42.63	1342
2005	22	2082.33	6118	563	94	7.07149e+06	342.066	79.64	1079.38
2005	23	4510.94	2288	577	41	4.34906e+06	737.419	183.28	1446.81
2005	24	8842.34	48248	49860	3237	3.25888e+08	2143.57	418.18	18849.9
2005	25	17255.6	169934	56190	23506	3.72074e+08	3345.39	287.49	35988.2
2005	26	5978.4	33734	13183	4779	4.34759e+07	1159.12	130.74	7188.69
2005	27	5866.85	21057	846	121	5.31424e+06	658.339	223.23	2220.38
2005	28	10110.4	15652	1238	478	6.64792e+06	1144.03	355.12	1982.12
2005	29	5872.71	11324	736	168	8.91491e+06	777.054	219.89	1242.52
2005	30	16187.4	24653	1947	337	1.42754e+07	1942.26	352.4	1950.44
2005	31	12992.1	8108	621	42	2.70821e+06	1160.67	367.21	1191.25
2005	32	29794.5	18745	1543	98	2.68948e+06	2139.63	439.64	1474.41
2005	33	2860.3	7241	525	56	386345	250.575	88.68	194.181
2005	34	16670.5	251145	88347	25638	2.04412e+09	10959.1	252.69	15802.5
2005	35	477.434	4099	787	119	2.52956e+07	270.195	14.84	629.441
2005	36	534.631	18819	55	22	594071	785.768	46.15	690.999
2004	1	3503.53	49983	1826	15082	2.00893e+08	1462.54	388.19	6343.26
2004	2	4082.14	10372	791	136	4.84288e+07	1865.03	76.07	3625.65
2004	3	461.389	14322	912	14927	1.79528e+06	87.8608	29.24	692.083
2004	4	728.796	27806	708	10691	1.7469e+06	133.333	39.64	623.039
2004	5	587.33	9468	930	868	9.05147e+06	175.437	45.48	856.83
2004	6	7355.36	102981	2072	1237	2.06319e+07	811.885	190.87	1820.78
2004	7	2948.63	37304	814	352	1.49799e+07	469.192	106.96	1026.11
2004	8	2646.43	33571	810	592	1.35551e+07	611.509	89.06	848.539
2004	9	2511.65	3110	302	55	2.44821e+06	314.456	20.17	238.157
2004	10	9782.66	153875	2629	870	3.86094e+07	1602.33	519.16	4550.25
2004	11	4171.13	11395	178	34	3.33427e+06	376.402	320.26	472.821
2004	12	2843.96	16480	212	94	1.63837e+06	208.643	181.9	279.277
2004	13	1379.62	8355	552	149	6.8399e+06	216.575	69.96	552.482
2004	14	1054.22	519	127	14	510578	118.44	52.79	110.94
2004	15	3301.43	318705	3849	1177	5.26156e+07	800.554	118.03	3081.35
2004	16	1258.63	1379	47	10	706169	301.707	61.82	338.324
2004	17	1198.08	726	68	9	324400	118.704	93.79	184.09
2004	18	8127.17	61423	9853	1757	1.08005e+09	1156.23	62.73	12173.8
2004	19	11615.2	323233	14274	8406	2.50455e+08	2402.14	315.66	20346.9
2004	20	3650.9	42982	1120	250	1.04668e+07	697.739	118.51	1040.6
2004	21	1876.93	47467	2557	322	1.53568e+07	446.85	38.67	1303.03
2004	22	1737.45	6028	577	84	6.89701e+06	272.439	64.74	883.721
2004	23	3817.35	2809	313	45	4.38235e+06	596.011	152.2	1129.29
2004	24	7184.29	47814	46641	3208	3.16766e+08	1828.35	407.19	18088.4
2004	25	13237.3	186888	45716	18623	3.14311e+08	2759.27	261.39	29702.5
2004	26	4837.66	35565	11531	4275	4.06376e+07	921.087	115.58	6403.53
2004	27	4846.95	15880	490	101	5.2423e+06	554.04	191.59	1966.62
2004	28	7914.64	19600	721	192	6.63233e+06	967.84	308.36	1705.51
2004	29	4868.95	10455	903	132	8.77778e+06	698.481	209.13	1146.52
2004	30	13709.9	40202	2194	330	1.56427e+07	1686.61	327.48	2079.64
2004	31	10521.5	7964	645	50	2.92566e+06	977.658	298.57	1119.35
2004	32	22515.8	14214	916	93	2.78231e+06	1778.8	333.4	1272.02
2004	33	2242.75	9902	829	67	401164	206.601	78.33	171.549
2004	34	12028.8	251565	79744	22770	1.83104e+09	8848.37	239.28	14578.4
2004	35	384.041	3503	454	164	2.3045e+07	219.909	14.49	535.751
2004	36	485.144	12600	39	34	588000	682.688	46.49	653.413
2003	1	1171.64	53168	1782	13746	2.01019e+08	1394.55	376.6	5395.84
2003	2	886.49	10644	828	138	1.42499e+08	1803.41	72.68	4618.43
2003	3	232.87	13031	796	8893	1.91469e+06	86.867	27.39	554.15
2003	4	441.29	22855	577	10543	1.64808e+06	139.946	41.37	570.605
2003	5	427.86	8609	378	1007	1.41499e+07	174.399	45.61	777.557
2003	6	4922.94	96383	1884	1205	2.83723e+07	757.377	181.66	1548.28
2003	7	2044.53	31230	1419	340	1.04118e+07	430.204	101.07	861.707
2003	8	1831.61	33366	800	567	1.20553e+07	616.845	89	703.048
2003	9	1071.07	4438	317	45	2.56922e+06	323.203	21.22	265.015
2003	10	6989.33	141264	2428	529	2.75937e+07	1528.98	499.16	3468.96
2003	11	3114.41	5266	184	33	2.37244e+06	341.894	289.19	399.443
2003	12	2028.4	13106	119	44	1.25765e+06	193.171	165.37	243.16
2003	13	938.14	6851	550	137	4.86161e+06	203.401	63.83	420.512
2003	14	643.5	386	492	9	896449	100.027	43.39	108.297
2003	15	2223.15	318336	155	1003	3.55989e+07	759.726	113.95	2371.45
2003	16	997.74	1569	3357	45	1.16501e+06	283.063	59.41	365.093
2003	17	893.71	694	88	2	329667	109.694	87.14	147.439
2003	18	2438.14	53762	54	1519	7.89358e+08	1139.32	59.66	8991.34
2003	19	8732.6	312825	7381	7442	2.29948e+08	2368.26	311.33	17108.2
2003	20	3895.63	35874	11989	259	1.06015e+07	620.472	115.4	1025.78
2003	21	1743.87	48847	1615	288	3.62418e+07	409.008	34.22	2199.87
2003	22	1341.99	6865	2724	81	5.2023e+06	253.991	62.24	738.485
2003	23	3017.57	2344	479	34	2.64248e+06	547.725	140.91	818.611
2003	24	5031.92	27718	188	2457	2.16411e+08	1664.61	396.22	12656.1
2003	25	6514.89	177456	32302	15317	2.85032e+08	2579.09	255.91	24069.7
2003	26	3095.39	31761	33841	3436	2.77743e+07	809.222	106.6	5408.79
2003	27	3606.21	15910	9939	87	3.94494e+06	502.462	171.24	1699.29
2003	28	5636.86	13467	431	180	6.15208e+06	905.359	283.49	1523.24
2003	29	3645.31	14038	536	249	7.20959e+06	674.281	205.31	924.09
2003	30	11935.1	40805	506	375	1.30045e+07	1575.1	311.77	1653.76
2003	31	9026.2	10253	1746	62	3.0588e+06	900.193	265.12	889.743
2003	32	22385.9	13214	591	63	1.4136e+06	1443.3	273.46	1044.36
2003	33	1654.6	9291	664	61	610158	195.746	71.96	199.211
2003	34	2588.49	248773	68008	19026	1.51674e+09	8590.71	238.41	13276.9
2003	35	158.93	3895	531	132	2.10767e+07	212.291	14.67	513.337
2003	36	138.62	15783	15	5	723392	667.457	46.27	549.712
2002	1	1002.7	48571	1407	13716	1.41002e+08	1271.12	379.71	4242.42
2002	2	644.81	9226	829	158	1.21694e+08	1700.51	56.01	4517.7
2002	3	165.38	13374	785	8019	1.17656e+06	72.8673	24.66	399.76
2002	4	378.57	27715	652	14451	1.60021e+06	139.918	43.02	427.46
2002	5	375.83	9222	374	1131	9.79157e+06	185.351	48.7	654.54
2002	6	3995.28	86764	1630	1163	9.49562e+08	689.446	173.52	1478.86
2002	7	1789.95	32077	1020	319	2.59273e+07	418.717	98.48	1604.63
2002	8	1625.82	35887	811	674	1.11136e+07	606.678	91	947.38
2002	9	1021.94	4366	336	41	11069169	333.52	23.21	662.64
2002	10	6141.97	132208	2022	511	2.43658e+06	1387.07	479.15	259.27
2002	11	2685.73	4392	140	33	2.4556e+07	316.963	265.75	2984.43
2002	12	1633.41	11874	153	94	2.09071e+06	168.728	141.29	355.2
2002	13	791.47	4047	438	122	1218033	193.18	51.71	209.77
2002	14	478.83	298	159	8	3.95953e+06	80.7456	33.97	324.27
2002	15	1882	319303	3316	941	759717	695.154	114.99	87.95
2002	16	807.35	1276	55	8	33864847	251.371	55.46	2180.54
2002	17	732.32	626	86	131	908166	102.5	75.56	197.46
2002	18	2132.71	54869	4763	1302	4.95945e+08	1158.83	55.85	154.52
2002	19	7212.97	321416	10817	6050	2.49964e+08	2265.94	310.13	8478.69
2002	20	3167.17	36691	1655	200	1.45971e+08	536.656	105.5	14507.7
2002	21	1472.76	53954	3090	352	28989120	418.586	37.73	845.44
2002	22	1105.83	7579	443	75	13959879	249.781	62.08	1942.76
2002	23	2478.21	2476	185	35	4.89569e+06	497.297	129.56	643.59
2002	24	4136.4	44483	36176	1966	3.60084e+06	1575.5	388.24	702.84
2002	25	4863.93	190268	29082	14232	1.72338e+08	2352.02	239.29	10624.6
2002	26	2415.37	34050	9320	3607	2.29609e+08	746.338	102.34	19327.5
2002	27	3160.19	14124	786	106	25349662	512.549	174.02	4372.95
2002	28	4201.58	12571	455	165	4.21821e+06	837.654	264.42	1481.75
2002	29	2721.09	13805	539	209	6.45782e+06	529.243	178.11	1325.07
2002	30	8865.89	24493	1849	342	5.21158e+06	1468.81	296.72	782.46
2002	31	6990.67	11207	707	93	1.3208e+07	846.431	238.98	1555.65
2002	32	16389.8	16936	797	80	3.19393e+06	1255.89	229.41	725.47
2002	33	1170.07	2102	65	8	1.11946e+06	150	56	798.87
2002	34	2194.35	209107	58322	16969	1.26532e+09	7406.55	233.25	11150.5
2002	35	141.96	3977	448	132	2.07532e+07	187.209	14.71	547.72
2002	36	124.9	9194	26	10	689975	602.242	45.39	543.83
2001	1	823.4	50644	1543	12728	1.33264e+08	1138.53	375.31	4053.14
2001	2	702.25	18778	1064	182	1.14447e+08	1636.68	59.89	4006.02
2001	3	141.72	13569	757	8041	1.24206e+06	61.011	21.37	351.16
2001	4	342.35	29862	218	13998	1.71552e+06	139.412	45.13	408.19
2001	5	336.01	11481	59	25	9.3548e+06	182.236	51.64	621.62
2001	6	3401.71	68434	1236	842	2.72796e+07	659.819	166.91	1478.68
2001	7	1457.53	30429	565	318	1.18185e+07	380.258	90.05	878.66
2001	8	1160.31	44640	774	734	1.19159e+07	589.374	94.98	634.33
2001	9	958.45	4009	360	43	2.5285e+06	342.434	24.74	264.94
2001	10	5309.73	128974	1817	513	2.58576e+07	1315.54	477.51	2679.32
2001	11	2371.67	3724	120	25	2.34975e+06	289.841	237.07	332.84
2001	12	1115.06	10905	166	78	1283925	154.341	127.01	189.18
2001	13	703.87	3491	436	100	4.05837e+06	185.604	51.29	320.88
2001	14	401.07	2947	112	15	830269	69.0989	29.83	95.49
2001	15	1603.29	309804	2735	906	3.27933e+07	647.918	113.81	1937.27
2001	16	694.75	1879	69	29	943418	235.418	54.67	201.73
2001	17	626.45	876	146	12	672028	87.1319	66.91	130.67
2001	18	2007.81	41741	4205	1106	632762827	1185.91	59.2	7837.34
2001	19	6156.48	330514	10366	5702	1.93984e+08	2135.22	318.57	12886.5
2001	20	2645.3	32634	582	241	9.66209e+06	462.973	102.99	841.15
2001	21	1263.06	59695	2811	355	3.38795e+07	412.088	40.27	1705.02
2001	22	950.5	7070	431	72	5.08151e+06	243.407	61.6	645.87
2001	23	2114.37	2588	246	33	2.65679e+06	469.253	117.14	658.83
2001	24	3614.92	46197	34062	1960	1.78024e+08	1515.19	392.61	9980.87
2001	25	4196.71	191745	25015	11858	2.08809e+08	2230.19	249.31	17136.3
2001	26	2120.56	37451	9958	4477	2.45853e+07	698.28	109.29	3892.76
2001	27	2699.06	11742	487	76	4.34573e+06	497.434	165.16	1229.4
2001	28	3422.73	15357	488	191	6.75061e+06	795.352	271.99	1161.52
2001	29	2258.33	13504	327	159	5892127	519.533	185.61	754.33
2001	30	6730.56	24251	1504	313	1.31204e+07	1389.8	296.22	1440.51
2001	31	6088.41	11294	770	83	3.34983e+06	810.495	225.55	593.64
2001	32	13169.1	15148	1165	43	1.25336e+06	1079.18	205	683.26
2001	33	1040.21	2405	55	9	496780	148.011	55.15	145.95
2001	34	1975.56	222997	53647	14925	1.11629e+09	6670.96	229.51	9727.44
2001	35	119.86	4207	461	119	18345744	168.791	14.71	468.98
2001	36	111.64	10380	16	193	785154	542.176	13.16	572.94
	max	82242.9	424597	202906	69085	3.31378e+09	20140.2	819.48	58896.6
	min	111.64	298	7	2	298419	61.011	13.16	87.95
	median	4454.66	20109	1053	314.952	1.04393e+07	765.152	132.01	1349.65
	st	11391.2	86909.1	26543.5	9630.27	4.37907e+08	2420.91	167.112	8843.4
	average	8762.51	55738.6	9511.56	4266.1	1.47374e+08	1524.11	201.111	4724.54

## Sheet: Results of GML by groups
	DMU	Efficiency Change (2001 TO 2002)	Efficiency Change (2002 TO 2003)	Efficiency Change (2003 TO 2004)	Efficiency Change (2004 TO 2005)	Efficiency Change (2005 TO 2006)	Efficiency Change (2006 TO 2007)	Efficiency Change (2007 TO 2008)	Efficiency Change (2008 TO 2009)	Efficiency Change (2009 TO 2010)	Efficiency Change (2010 TO 2011)	AVERAGE		Technological Change (2001 TO 2002)	Technological Change (2002 TO 2003)	Technological Change (2003 TO 2004)	Technological Change (2004 TO 2005)	Technological Change (2005 TO 2006)	Technological Change (2006 TO 2007)	Technological Change (2007 TO 2008)	Technological Change (2008 TO 2009)	Technological Change (2009 TO 2010)	Technological Change (2010 TO 2011)	AVERAGE		Malmquist Index (2001 TO 2002)	Malmquist Index (2002 TO 2003)	Malmquist Index (2003 TO 2004)	Malmquist Index (2004 TO 2005)	Malmquist Index (2005 TO 2006)	Malmquist Index (2006 TO 2007)	Malmquist Index (2007 TO 2008)	Malmquist Index (2008 TO 2009)	Malmquist Index (2009 TO 2010)	Malmquist Index (2010 TO 2011)	AVERAGE
Green intensive
	02	0.989108	0.929494	1.57541	0.98583	0.973606	1.00149	0.995146	0.990608	0.945099	0.984388	1.03702		1.00404	1.25278	1.3173	0.98813	1.02208	1.00853	0.988522	1.0319	1.04247	1.02713	1.06829		0.993098	1.16445	2.0753	0.974128	0.995105	1.01003	0.983723	1.0222	0.985236	1.0111	1.12144
	06	0.977263	0.974644	1.11069	1.00742	1.01138	0.988726	1.00605	1.01582	1.01092	0.995451	1.00984		1.05043	1.06124	0.977841	1.00623	1.01725	1.01472	0.996101	1.00864	1.0049	1.01695	1.01543		1.02655	1.03434	1.08608	1.01369	1.02882	1.00328	1.00213	1.02459	1.01587	1.01232	1.02477
	07	0.972593	0.98668	1.11506	1.01909	1.00865	0.998716	0.99329	0.992975	1.0047	1.02243	1.01142		1.04806	1.04792	0.980898	0.999626	1.02714	1.02794	1.00791	1.00533	1.01666	1.02569	1.01872		1.01933	1.03396	1.09376	1.01871	1.03602	1.02662	1.00115	0.998268	1.02144	1.0487	1.0298
	08	1.13806	0.951714	1.12097	1.02094	0.980602	1.02565	1.03387	0.996208	0.996554	1.03445	1.0299		1.04525	1.11551	1.04741	1.02316	1.00816	1.03584	1.0186	1.01804	1.01259	1.01925	1.03438		1.18956	1.06164	1.17411	1.04458	0.988601	1.06241	1.0531	1.01418	1.0091	1.05436	1.06516
	09	1	1	1	1	1	1	1	1	1	1	1		1.06771	1.22306	1.3899	1	1	1	1	1	1	1	1.06807		1.06771	1.22306	1.3899	1	1	1	1	1	1	1	1.06807
	10	1.91786	0.467482	1.12457	1.01025	0.992998	1.02268	1.02974	1.01658	0.992359	0.993694	1.05682		0.707589	1.64415	0.978535	1.01514	1.01766	1.02376	0.999115	0.995556	1.02957	1.00085	1.04119		1.35705	0.768611	1.10043	1.02555	1.01054	1.04699	1.02883	1.01207	1.0217	0.994543	1.03663
	17	1	1	1	1	1	1	1	1	1	1	1		1	1	1	1	1	1	0.936997	0.995181	1.07241	1	1.00046		1	1	1	1	1	1	0.936997	0.995181	1.07241	1	1.00046
	20	0.937629	0.977203	1.03954	1.03807	1.02483	1.00668	1.0071	1.02533	0.988451	0.974615	1.00195		1.05289	1.02723	0.974594	0.999121	1.03629	1.01878	1.00332	0.996524	1.02605	1.03955	1.01744		0.987217	1.00381	1.01313	1.03716	1.06203	1.02559	1.01045	1.02177	1.01421	1.01316	1.01885
	21	1.05021	1.00171	0.924898	1.02357	0.993517	1.01843	0.984929	0.997632	0.997852	1.02259	1.00153		1.00935	1.09435	1.0675	1.03114	1.06281	1.03939	1.01333	1.02239	1.03198	1.02385	1.03961		1.06003	1.09622	0.987332	1.05544	1.05592	1.05854	0.998062	1.01997	1.02977	1.04697	1.04082
	23	1	0.667807	1.06516	1.40583	0.68714	0.964691	1.00165	1.06789	0.973417	0.898223	0.973181		1.03519	1.55957	0.983665	0.742729	1.46063	1.04275	1.00734	0.977055	1.06036	1.05391	1.09232		1.03519	1.04149	1.04777	1.04415	1.00365	1.00593	1.009	1.04339	1.03217	0.946647	1.02094
	27	0.922588	0.93436	1.15688	0.971452	0.978703	0.985524	1.03745	1.01465	1.00073	1.01616	1.00185		1.10119	1.10068	0.939481	1.03691	1.04081	1.02419	0.995568	0.993651	1.03681	1.01489	1.02842		1.01594	1.02843	1.08687	1.00731	1.01864	1.00937	1.03286	1.00821	1.03757	1.03129	1.02765
	32	1	1	1	1	1	1	1	1	1	1	1		1.0279	1.4529	0.78393	1.04516	1.05385	1.15815	0.854116	1.02133	1.00267	1.14329	1.05433		1.0279	1.4529	0.78393	1.04516	1.05385	1.15815	0.854116	1.02133	1.00267	1.14329	1.05433
	34	0.948277	0.995062	1.65797	1.03456	1.0055	1.79085	1	1	1	1	1.14322		1.11707	1.09732	1.11453	1.02489	1.01994	0.574978	1.01367	1.0041	1.09607	1.65574	1.07183		1.0593	1.0919	1.84785	1.06031	1.02554	1.0297	1.01367	1.0041	1.09607	1.65574	1.18842
	36	1	1	1	1	1	1	1	1	1	1	1		1	1	0.695556	0.959659	1.07489	1.39376	0.642245	1.55704	0.698791	1.43104	1.0453		1	1	0.695556	0.959659	1.07489	1.39376	0.642245	1.55704	0.698791	1.43104	1.0453
Intermediate
	05	0.783573	1.2811	0.881859	2.02331	1	1	1	1	1	1	1.09698		0.819705	0.862237	1.25644	0.573933	0.995055	1.04502	0.985535	1.02282	1.02524	1.03673	0.962272		0.642298	1.10461	1.108	1.16124	0.995055	1.04502	0.985535	1.02282	1.02524	1.03673	1.01266
	11	0.747789	0.900636	1.48481	0.696234	1.4363	1	1	1	1	0.645459	0.991123		1.30271	1.12549	0.683454	1.42285	0.712031	1.04821	1.00087	1.05345	1.54152	0.993852	1.08844		0.974154	1.01365	1.0148	0.990634	1.02269	1.04821	1.00087	1.05345	1.54152	0.641491	1.03015
	14	1	1	1	1	1	1	1	1	1	1	1		1	1	1	0.749008	1.01244	0.989508	0.945589	1.11701	0.946326	1.33328	1.00932		1	1	1	0.749008	1.01244	0.989508	0.945589	1.11701	0.946326	1.33328	1.00932
	19	0.984876	0.970588	1.07321	1.01543	1.01232	1.01751	1.00856	1.01715	1.00372	1.00435	1.01077		1.08779	1.11593	0.998219	1.00925	1.02974	1.01576	1.00392	1.01822	1.0153	1.01628	1.03104		1.07134	1.08311	1.07129	1.02482	1.04242	1.03355	1.01251	1.03568	1.01908	1.0207	1.04145
	24	1.07036	1.33006	0.73322	1.00054	1.03966	1.05594	1.04187	1.03116	1.01356	0.943918	1.02603		1.20019	1.03873	0.970362	1.02405	1.03374	1.02262	1.00229	0.998992	1.02006	1.06273	1.03738		1.28463	1.38157	0.71149	1.02459	1.07473	1.07983	1.04426	1.03012	1.0339	1.00313	1.06683
	25	0.979844	1.01068	1.1997	1.02296	1.01097	1.79097	1	1	1	1	1.10151		1.10777	1.08686	1.02307	1.0164	1.02229	0.574557	1.01078	1.01467	1.00848	1.78834	1.06532		1.08544	1.09846	1.22738	1.03974	1.03351	1.02902	1.01078	1.01467	1.00848	1.78834	1.13358
	33	1	1	1	1	1	1	1	1	1	1	1		1	0.599363	1.66844	0.919949	0.7177	0.994387	0.97712	1.01838	1.01709	1.50495	1.04174		1	0.599363	1.66844	0.919949	0.7177	0.994387	0.97712	1.01838	1.01709	1.50495	1.04174
Extensive
	01	0.979686	0.904836	2.05188	0.98356	0.946548	1.03352	1.0877	1.02965	1.05721	1.05775	1.11323		1.11572	1.13915	0.986583	1.039	1.05441	1.02677	0.995153	1.01871	1.01703	1.02038	1.04129		1.09305	1.03074	2.02435	1.02192	0.998054	1.06119	1.08243	1.04892	1.07522	1.07931	1.15152
	03	1	1	1	1	1	0.54617	0.887404	1.04903	0.974381	1.0056	0.946259		0.645423	0.793555	1.10341	0.821072	1.01588	1.83616	1.07355	0.995938	1.04489	1.03414	1.0364		0.645423	0.793555	1.10341	0.821072	1.01588	1.00286	0.95267	1.04478	1.01812	1.03993	0.94377
	04	1.22954	1.00741	1.13364	1.46663	1	1	0.518221	1.08767	0.905455	1.9594	1.1308		0.821288	1.06031	1.03896	0.667705	0.970598	0.975491	1.86104	0.967534	1.0715	0.593159	1.00276		1.0098	1.06817	1.17781	0.979274	0.970598	0.975491	0.964431	1.05235	0.970193	1.16223	1.03304
	12	1.30136	0.804795	1.50713	1	1	1	1	1	1	1	1.06133		0.781178	1.27762	0.668487	0.98094	1.01198	1.01545	0.980757	1.01305	1.67272	1	1.04022		1.01659	1.02822	1.0075	0.98094	1.01198	1.01545	0.980757	1.01305	1.67272	1	1.07272
	13	1.68206	0.54732	1.01573	1.05295	1.00891	1.00767	1.01981	0.999727	1.00853	0.977539	1.03202		0.632154	1.72469	1.05428	0.940714	1.01832	1.01855	0.988529	1.00857	1.03602	1.0689	1.04907		1.06332	0.94396	1.07087	0.990525	1.0274	1.02635	1.00812	1.00829	1.04486	1.04489	1.02286
	15	2.37454	0.538971	0.892052	1.02296	1.00663	1.02516	1.01847	1.00232	1.01204	0.998286	1.08914		1.28737	0.868916	0.97307	1.01885	1.0416	1.03198	1.01409	1.01957	1.02171	1.02228	1.02994		3.05691	0.46832	0.868029	1.04224	1.04852	1.05795	1.03283	1.02194	1.03401	1.02053	1.16513
	16	1	0.616184	1.62289	1	1	1	1	1	1	1	1.02391		1.32173	0.803833	1.24404	0.896069	1.11599	0.843178	0.939537	0.961639	1.04883	1.08591	1.02607		1.32173	0.495309	2.01894	0.896069	1.11599	0.843178	0.939537	0.961639	1.04883	1.08591	1.07271
	18	1.86564	1	1	1	1	1	1	1	1	1	1.08656		0.751189	1.08317	0.927885	1.0026	1.00594	1.00814	0.998284	1.00697	1.00928	1.77173	1.05652		1.40145	1.08317	0.927885	1.0026	1.00594	1.00814	0.998284	1.00697	1.00928	1.77173	1.12154
	22	0.986248	0.994717	1.08181	1.02114	0.981622	1.01239	1.00158	1.00539	0.98109	0.915557	0.998154		1.04413	1.03965	0.996417	0.951516	1.0282	1.0071	1.01602	1.01267	1.04218	1.06478	1.02027		1.02977	1.03415	1.07794	0.971631	1.00931	1.01957	1.01763	1.01812	1.02248	0.974871	1.01755
	26	1.02429	1.01461	1.09105	1.01521	1.02541	1.00762	1.0079	1.02186	0.989997	0.983303	1.01812		1.00448	1.07609	1.04636	1.01492	1.03693	1.01657	1.00437	1.01746	1.0189	1.03351	1.02696		1.02889	1.09182	1.14163	1.03035	1.06328	1.02431	1.0123	1.0397	1.0087	1.01625	1.04572
	28	1.04405	0.892577	1.07809	0.997177	1.05104	1.03875	0.975299	1.05853	0.97866	1.44278	1.0557		1.04006	1.20368	0.958626	1.02064	1.00981	1.00843	1.02262	0.974412	1.0732	1.00425	1.03157		1.08588	1.07438	1.03349	1.01776	1.06136	1.04751	0.99736	1.03144	1.0503	1.44891	1.08484
	29	0.925177	0.923361	1.13112	1.03354	1.02284	1.05547	1.04651	0.91825	1.03307	0.983697	1.0073		1.12708	1.13631	0.946196	1.00262	1.03597	0.997626	0.994703	1.04969	1.02279	1.02661	1.03396		1.04275	1.04923	1.07026	1.03624	1.05964	1.05296	1.04097	0.963874	1.05661	1.00987	1.03824
	30	1.05649	0.977077	0.96138	1.06284	0.999348	1.04746	1.01636	1.48363	1	1	1.06046		1.04951	1.12638	0.980724	0.981922	1.01853	1.00055	0.997305	0.724932	1.12574	1.29532	1.03009		1.1088	1.10056	0.942848	1.04363	1.01786	1.04803	1.01362	1.07553	1.12574	1.29532	1.0772
	31	0.977148	0.951331	1.25757	1.21892	1	1	1	1	1	1	1.0405		1.02343	1.11188	0.850435	0.888953	1.10031	1.07167	1.03576	1.00688	1.17723	1	1.02665		1.00004	1.05776	1.06948	1.08357	1.10031	1.07167	1.03576	1.00688	1.17723	1	1.06027
	35	1	1	1	1	1	1	1	1	1	1	1		1	0.787558	1.26975	0.825347	1.21161	1	0.558587	1.79023	0.680838	1.46878	1.05927		1	0.787558	1.26975	0.825347	1.21161	1	0.558587	1.79023	0.680838	1.46878	1.05927

## Sheet: EKC
dmu	population	GDP	perGDP	E	ratio	water	perwater	SO2	perso2	SOLID	persolid	year	lnwater	lnso2	lnsolid	lnGDP	energy		population
1	134735	11602.6	0.0861139	11566.5	0.088737	143493	1.065	12.9254	9.5932e-05	129.84	0.000963669	2011	0.0629764	-9.25187	-6.94476	-2.45208	0.082901	2001	127627
1	134091	9777.29	0.0729154	10574.4	0.220537	104765	0.7813	16.0254	0.000119512	187.729	0.00140001	2010	-0.246796	-9.0321	-6.57127	-2.61846	0.221469
1	133450	7976.21	0.0597693	10206.5	0.145627	80235.5	0.60124	14.9861	0.000112298	261.349	0.0019584	2009	-0.508761	-9.09436	-6.23563	-2.81726	0.153234
1	132802	7244.51	0.0545512	9356.17	0.442125	72209	0.543734	14.8675	0.000111952	247	0.00185991	2008	-0.609295	-9.09744	-6.28723	-2.90862	0.34328
1	132129	5867.32	0.044406	7170.75	0.172475	73039.7	0.55279	17.5278	0.000132657	361.754	0.00273789	2007	-0.592776	-8.92774	-5.90057	-3.11438	0.173532
1	131448	4770.39	0.0362911	6786.54	0.0170949	54023	0.410984	14.5	0.00011031	374.146	0.00284634	2006	-0.889201	-9.11222	-5.86172	-3.31618	0.0166147
1	130756	3977.03	0.0304156	6916.95	0.0762377	46650	0.356771	21.0412	0.00016092	444	0.00339564	2005	-1.03066	-8.73461	-5.68526	-3.4928	0.139257
1	129988	3503.53	0.0269527	6343.26	0.00859872	49983	0.38452	15.2093	0.000117005	461.39	0.00354948	2004	-0.955759	-9.05329	-5.64095	-3.61367	0.00832676
1	129227	1171.64	0.00906653	5395.84	0.0694453	53168	0.411431	155244	1.20133	532	0.00411679	2003	-0.888114	0.183428	-5.49268	-4.70317	0.0732228
1	128453	1002.7	0.00780597	4242.42	0.0968134	48571	0.378123	185960	1.44769	562	0.00437514	2002	-0.972536	0.369969	-5.43182	-4.85287	0.0796979
1	127627	823.4	0.00645161	4053.14	0.0310954	50644	0.396813	177672	1.39212	619	0.00485007	2001	-0.924291	0.330827	-5.32876	-5.04343	0.0290503
2	134735	4816.6	0.0357487	3934.36	0.0301841	8172	0.0606524	2.5145	1.86626e-05	0.01	7.42198e-08	2011	-2.8026	-10.889	-16.4162	-3.33124	0.0281989	2002	128453
2	134091	4616.05	0.0344248	4057.55	0.0846228	11554.6	0.0861698	3.55894	2.65412e-05	0.03855	2.87491e-07	2010	-2.45144	-10.5368	-15.0621	-3.36898	0.0849805
2	133450	4821.81	0.036132	3945.9	0.0562999	10197.5	0.0764143	3.53019	2.64533e-05	0.029421	2.20465e-07	2009	-2.57159	-10.5401	-15.3275	-3.32058	0.059241
2	132802	4496.77	0.0338607	4210.04	0.198945	11209	0.0844038	3.1387	2.36344e-05	0.03	2.259e-07	2008	-2.47214	-10.6528	-15.3032	-3.3855	0.154468
2	132129	4293.83	0.0324972	3677.49	0.0884528	9987.95	0.0755924	3.03933	2.30027e-05	0.0816	6.17578e-07	2007	-2.5824	-10.6799	-14.2975	-3.4266	0.0889952
2	131448	4072.99	0.0309856	3626.2	0.00913417	11177	0.0850298	3	2.28227e-05	10.7394	8.17006e-05	2006	-2.46475	-10.6878	-9.41245	-3.47423	0.00887762
2	130756	4046.85	0.0309496	3761.33	0.0414569	11252	0.0860534	3.2177	2.46084e-05	1	7.64783e-06	2005	-2.45279	-10.6124	-11.7811	-3.4754	0.075726
2	129988	4082.14	0.031404	3625.65	0.00491481	10372	0.079792	2.4912	1.91648e-05	2.13126	1.63958e-05	2004	-2.52833	-10.8624	-11.0185	-3.46082	0.00475936
2	129227	886.49	0.00685994	4618.43	0.0594398	10644	0.0823667	23538	0.182145	2.14	1.656e-05	2003	-2.49657	-1.70295	-11.0085	-4.98206	0.0626731
2	128453	644.81	0.00501981	4517.7	0.103095	9226	0.0718239	33135	0.257954	2	1.55699e-05	2002	-2.63354	-1.35497	-11.0702	-5.29436	0.0848693
2	127627	702.25	0.00550236	4006.02	0.0307339	18778	0.147132	32217	0.252431	2	1.56707e-05	2001	-1.91643	-1.37662	-11.0637	-5.20258	0.0287126
3	134735	3510.23	0.0260528	1920.7	0.0147355	22643	0.168056	2.6055	1.9338e-05	56.35	0.000418228	2011	-1.78346	-10.8534	-7.77948	-3.64763	0.0137664	2003	129227
3	134091	3002.75	0.0223934	1573.35	0.0328132	15352.5	0.114493	5.27692	3.93533e-05	21.6175	0.000161215	2010	-2.16724	-10.1429	-8.73277	-3.79899	0.0329519
3	133450	2235.48	0.0167514	1250.9	0.0178478	15546.2	0.116495	5.45381	4.08678e-05	25.534	0.000191337	2009	-2.14991	-10.1052	-8.56147	-4.08927	0.0187802
3	132802	1642.92	0.0123712	1408.03	0.0665363	16859	0.126948	5.3084	3.99723e-05	65	0.00048945	2008	-2.06397	-10.1273	-7.62223	-4.39238	0.051661
3	132129	1222.98	0.00925597	1313.84	0.0316011	16031.6	0.121333	5.36703	4.06196e-05	229.832	0.00173945	2007	-2.10922	-10.1113	-6.35418	-4.68249	0.0317949
3	131448	878.959	0.00668674	1111.95	0.00280093	15431	0.117392	5.3	4.03201e-05	115.819	0.000881099	2006	-2.14223	-10.1187	-7.03434	-5.00763	0.00272226
3	130756	606.488	0.00463832	946.09	0.0104277	14239	0.108897	4.3213	3.30486e-05	227	0.00173606	2005	-2.21735	-10.3175	-6.35614	-5.3734	0.0190474
3	129988	461.389	0.00354947	692.083	0.000938164	14322	0.110179	5.719	4.39964e-05	219.974	0.00169226	2004	-2.20565	-10.0314	-6.38169	-5.64096	0.000908492
3	129227	232.87	0.00180202	554.15	0.00713199	13031	0.100838	32266	0.249685	226	0.00174886	2003	-2.29424	-1.38756	-6.34879	-6.31885	0.00751995
3	128453	165.38	0.00128747	399.76	0.00912265	13374	0.104116	28166	0.219271	158	0.00123002	2002	-2.26225	-1.51745	-6.70072	-6.65507	0.00750988
3	127627	141.72	0.00111042	351.16	0.00269407	13569	0.106318	68670	0.538052	146	0.00114396	2001	-2.24132	-0.6198	-6.77326	-6.80301	0.00251689
4	134735	2021.56	0.0150039	1146.53	0.00879609	51181	0.379864	1.7832	1.32349e-05	90.11	0.000668794	2011	-0.967942	-11.2327	-7.31003	-4.19944	0.00821759	2004	129988
4	134091	1754.55	0.0130848	954.16	0.0198996	38851.6	0.289741	11.1247	8.29634e-05	77.836	0.000580471	2010	-1.23877	-9.39711	-7.45167	-4.33631	0.0199837
4	133450	1546.63	0.0115896	832.89	0.0118836	37307.3	0.27956	12.3028	9.21903e-05	121.567	0.000910952	2009	-1.27454	-9.29166	-7.00102	-4.45765	0.0125044
4	132802	1332.84	0.0100363	863.14	0.0407876	42764	0.322013	15.3857	0.000115854	66	0.00049698	2008	-1.13316	-9.06318	-7.60696	-4.60155	0.0316688
4	132129	1171.53	0.00886656	820.251	0.0197291	43373.6	0.328267	18.2469	0.000138099	115.44	0.000873689	2007	-1.11393	-8.88754	-7.04279	-4.72547	0.0198501
4	131448	963.517	0.00733003	719.149	0.00181149	42296	0.32177	9.8	7.45542e-05	227.692	0.00173218	2006	-1.13392	-9.50398	-6.35837	-4.91578	0.00176061
4	130756	811.091	0.00620309	663.556	0.00731363	31136	0.238123	6.697	5.12175e-05	140	0.0010707	2005	-1.43497	-9.87943	-6.83945	-5.08271	0.0133592
4	129988	728.796	0.00560664	623.039	0.000844571	27806	0.213912	6.1522	4.7329e-05	143.462	0.00110365	2004	-1.54219	-9.95839	-6.80913	-5.1838	0.000817859
4	129227	441.29	0.00341484	570.605	0.00734377	22855	0.176859	48819	0.377777	177	0.00136968	2003	-1.7324	-0.973451	-6.59318	-5.67962	0.00774325
4	128453	378.57	0.00294715	427.46	0.00975477	27715	0.21576	58746	0.457335	268	0.00208637	2002	-1.53359	-0.78234	-6.17233	-5.82692	0.00803025
4	127627	342.35	0.00268243	408.19	0.0031316	29862	0.233979	31350	0.245638	382	0.0029931	2001	-1.45253	-1.4039	-5.81145	-5.92103	0.00292564
5	134735	2495.49	0.0185215	1173.91	0.00900618	6191	0.0459495	4.6271	3.43422e-05	5.41	4.01529e-05	2011	-3.08021	-10.2791	-10.1228	-3.98883	0.00841386	2005	130756
5	134091	2189.28	0.0163268	1026.38	0.0214058	7683.1	0.0572977	4.1345	3.08335e-05	5.66298	4.22324e-05	2010	-2.8595	-10.3869	-10.0723	-4.11494	0.0214963
5	133450	1733.65	0.012991	1095.77	0.0156344	7718.52	0.0578383	4.52304	3.38932e-05	6.99168	5.23917e-05	2009	-2.8501	-10.2923	-9.85676	-4.3435	0.0164511
5	132802	1377.3	0.010371	1028.27	0.0485908	9309	0.0700968	6.3392	4.77342e-05	7	5.271e-05	2008	-2.65788	-9.94986	-9.8507	-4.56874	0.0377275
5	132129	1116.56	0.00845053	946.929	0.022776	8663.41	0.0655678	6.57763	4.97818e-05	13.0676	9.89e-05	2007	-2.72467	-9.90786	-9.2214	-4.77353	0.0229157
5	131448	867.778	0.00660168	896.742	0.00225884	9842	0.0748737	5.6	4.26024e-05	23.2996	0.000177254	2006	-2.59195	-10.0636	-8.63793	-5.02043	0.00219539
5	130756	653.651	0.00499901	862.513	0.0095065	12968	0.0991771	5.6962	4.35636e-05	22	0.000168252	2005	-2.31085	-10.0413	-8.69005	-5.29851	0.0173648
5	129988	587.33	0.00451834	856.83	0.00116149	9468	0.0728375	3.6839	2.83403e-05	26.6634	0.000205122	2004	-2.61952	-10.4712	-8.49191	-5.39961	0.00112476
5	129227	427.86	0.00331092	777.557	0.0100073	8609	0.0666192	47834	0.370155	31	0.000239888	2003	-2.70876	-0.993834	-8.33534	-5.71053	0.0105516
5	128453	375.83	0.00292582	654.54	0.0149368	9222	0.0717928	66415	0.517037	50	0.000389247	2002	-2.63397	-0.65964	-7.8513	-5.83418	0.0122962
5	127627	336.01	0.00263275	621.62	0.00476902	11481	0.0899575	5014	0.0392864	50	0.000391767	2001	-2.40842	-3.23688	-7.84484	-5.93973	0.00445537
6	134735	26340.3	0.195497	2663.79	0.0204364	138116	1.02509	23.9869	0.00017803	6.65	4.93561e-05	2011	0.024784	-8.63356	-9.91645	-1.63221	0.0190923	2006	131448
6	134091	23059.3	0.171967	2644.27	0.055148	143100	1.06718	16.9325	0.000126276	4.70867	3.51155e-05	2010	0.0650222	-8.97704	-10.2569	-1.76045	0.055381
6	133450	19480.5	0.145976	2795.37	0.0398842	143838	1.07784	16.0944	0.000120602	2.92317	2.19046e-05	2009	0.0749584	-9.02301	-10.7288	-1.92431	0.0419678
6	132802	16001.8	0.120493	2731.34	0.129069	157770	1.18801	16.3253	0.00012293	3	2.259e-05	2008	0.172279	-9.0039	-10.698	-2.11616	0.100214
6	132129	13390.1	0.101341	2335.75	0.0561806	148589	1.12458	17.0253	0.000128854	5.01822	3.79797e-05	2007	0.117406	-8.95683	-10.1785	-2.28927	0.0565252
6	131448	11249.4	0.0855805	2155.75	0.0054302	94414	0.718261	16.8	0.000127807	6.83712	5.20139e-05	2006	-0.330922	-8.96499	-9.864	-2.4583	0.00527768
6	130756	9213.49	0.0704632	2034.4	0.0224229	118964	0.909817	15.6126	0.000119403	45	0.000344152	2005	-0.0945121	-9.03301	-7.97443	-2.65266	0.0409581
6	129988	7355.36	0.0565849	1820.78	0.00246819	102981	0.792235	17.7194	0.000136316	36.6045	0.000281599	2004	-0.232898	-8.90054	-8.17503	-2.87201	0.00239013
6	129227	4922.94	0.0380953	1548.28	0.0199266	96383	0.745843	168189	1.3015	23	0.000177981	2003	-0.293241	0.263518	-8.63383	-3.26766	0.0210105
6	128453	3995.28	0.031103	1478.86	0.0337481	86764	0.675453	172742	1.34479	22	0.000171269	2002	-0.392371	0.296236	-8.67228	-3.47045	0.0277818
6	127627	3401.71	0.0266535	1478.68	0.0113443	68434	0.536203	116657	0.914046	13	0.000101859	2001	-0.623242	-0.0898739	-9.19192	-3.62483	0.0105982
7	134735	10820.7	0.0803109	1517.97	0.0116457	51950	0.385572	14.163	0.000105117	0.67	4.97272e-06	2011	-0.953028	-9.16043	-12.2115	-2.52185	0.0108798	2007	132129
7	134091	9290.73	0.0692868	1508.52	0.0314612	54549	0.406806	11.5646	8.62443e-05	1.53503	1.14477e-05	2010	-0.899419	-9.35833	-11.3777	-2.6695	0.0315941
7	133450	7795.92	0.0584183	1563.34	0.0223057	52699.1	0.394898	10.7581	8.06153e-05	1.15868	8.68249e-06	2009	-0.929129	-9.42582	-11.6542	-2.84013	0.0234709
7	132802	6597.64	0.0496803	1544.66	0.0729927	47833	0.360183	12.0751	9.09256e-05	1	7.53001e-06	2008	-1.02114	-9.30547	-11.7966	-3.00215	0.056674
7	132129	5605.41	0.0424237	1322.19	0.0318021	42823.7	0.324105	11.7165	8.86744e-05	2.26173	1.71176e-05	2007	-1.12669	-9.33054	-10.9754	-3.16005	0.0319971
7	131448	4465.91	0.0339747	1256.07	0.00316397	43113	0.327985	10.5	7.98795e-05	1.7713	1.34753e-05	2006	-1.11479	-9.43499	-11.2147	-3.38214	0.0030751
7	130756	3619.68	0.0276827	1169.46	0.0128896	42830	0.327557	9.3538	7.15363e-05	3	2.29435e-05	2005	-1.11609	-9.54531	-10.6825	-3.58695	0.0235444
7	129988	2948.63	0.0226839	1026.11	0.00139096	37304	0.28698	8.255	6.35059e-05	8.14481	6.26581e-05	2004	-1.24834	-9.66438	-9.67782	-3.7861	0.00134697
7	129227	2044.53	0.0158212	861.707	0.0110903	31230	0.241668	70705	0.547138	9	6.96449e-05	2003	-1.42019	-0.603054	-9.5721	-4.1464	0.0116936
7	128453	1789.95	0.0139347	1604.63	0.0366182	32077	0.249718	87498	0.681167	3	2.33548e-05	2002	-1.38742	-0.383947	-10.6647	-4.27338	0.0301445
7	127627	1457.53	0.0114202	878.66	0.00674101	30429	0.238421	72231	0.565954	2	1.56707e-05	2001	-1.43372	-0.569243	-11.0637	-4.47237	0.00629767
8	134735	10259.2	0.0761438	1197.41	0.0091864	71664	0.531889	13.4222	9.96193e-05	1.59	1.18009e-05	2011	-0.631321	-9.21416	-11.3473	-2.57513	0.00858223	2008	132802
8	134091	8285.93	0.0617933	1130.42	0.0235756	75519.2	0.563194	11.1783	8.33638e-05	2.39291	1.78454e-05	2010	-0.574132	-9.3923	-10.9338	-2.78396	0.0236753
8	133450	6954.81	0.0521154	1191.44	0.0169994	69673.6	0.522095	10.578	7.92658e-05	7.47794	5.60355e-05	2009	-0.649906	-9.4427	-9.78952	-2.95429	0.0178875
8	132802	5859.35	0.044121	1161.85	0.0549031	70840	0.533426	11.2082	8.43978e-05	5	3.765e-05	2008	-0.628435	-9.37997	-10.1872	-3.12082	0.0426286
8	132129	4940.61	0.0373923	979.851	0.0235679	63156.4	0.47799	12.3623	9.35626e-05	5.52052	4.17813e-05	2007	-0.738165	-9.27688	-10.0831	-3.28629	0.0237124
8	131448	3835.96	0.0291823	948.612	0.00238949	56049	0.426397	11.6	8.82478e-05	6.58651	5.01073e-05	2006	-0.852385	-9.33536	-9.90134	-3.53419	0.00232238
8	130756	3054.35	0.0233592	879.567	0.00969448	43404	0.331947	10.6574	8.1506e-05	6	4.5887e-05	2005	-1.10278	-9.41483	-9.98933	-3.75677	0.0177081
8	129988	2646.43	0.020359	848.539	0.00115025	33571	0.258262	11.3247	8.71211e-05	7.63814	5.87603e-05	2004	-1.35378	-9.34821	-9.74204	-3.89423	0.00111387
8	129227	1831.61	0.0141736	703.048	0.00904833	33366	0.258197	105958	0.819937	8	6.19066e-05	2003	-1.35403	-0.198528	-9.68988	-4.25638	0.00954052
8	128453	1625.82	0.0126569	947.38	0.0216195	35887	0.279378	127538	0.992877	11	8.56344e-05	2002	-1.27519	-0.00714872	-9.36542	-4.36955	0.0177974
8	127627	1160.31	0.00909141	634.33	0.00486653	44640	0.349769	184549	1.446	7	5.48473e-05	2001	-1.05048	0.368803	-9.81096	-4.70042	0.00454647
9	134735	6500.86	0.0482492	272.309	0.00208913	2090	0.0155119	1.1074	8.2191e-06	0.43	3.19145e-06	2011	-4.16615	-11.7091	-12.655	-3.03138	0.00195174	2009	133450
9	134091	5598.01	0.0417478	228.89	0.00477365	2672.7	0.019932	1.00131	7.46739e-06	0.5739	4.27993e-06	2010	-3.91543	-11.805	-12.3616	-3.17611	0.00479383
9	133450	4739.15	0.0355126	233.8	0.00333585	3252.79	0.0243746	1.16198	8.70724e-06	0.2751	2.06145e-06	2009	-3.71421	-11.6514	-13.0921	-3.33787	0.00351011
9	132802	4341.11	0.0326886	232.6	0.0109915	2917	0.021965	1.5612	1.17558e-05	0.29	2.1837e-06	2008	-3.8183	-11.3512	-13.0345	-3.42073	0.00853416
9	132129	3670.91	0.0277828	230.186	0.00553656	2873.2	0.0217454	1.36258	1.03125e-05	0.28836	2.18241e-06	2007	-3.82835	-11.4822	-13.0351	-3.58334	0.00557051
9	131448	3136.94	0.0238645	232.285	0.00058511	2844	0.0216359	1.5	1.14114e-05	0.231128	1.75832e-06	2006	-3.8334	-11.3809	-13.2512	-3.73536	0.000568676
9	130756	2786.42	0.0213101	237.685	0.00261973	2809	0.0214828	1.2896	9.86264e-06	11	8.41262e-05	2005	-3.8405	-11.5268	-9.38319	-3.84857	0.00478525
9	129988	2511.65	0.0193222	238.157	0.000322838	3110	0.0239253	1.3095	1.0074e-05	0.591332	4.54913e-06	2004	-3.73282	-11.5056	-12.3006	-3.9465	0.000312628
9	129227	1071.07	0.00828828	265.015	0.00341078	4438	0.0343427	14709	0.113823	2	1.54766e-05	2003	-3.37137	-2.17311	-11.0762	-4.79291	0.00359631
9	128453	1021.94	0.00795575	662.64	0.0151217	4366	0.0339891	14164	0.110266	2	1.55699e-05	2002	-3.38172	-2.20486	-11.0702	-4.83386	0.0124483
9	127627	958.45	0.00750977	264.94	0.0020326	4009	0.0314118	19216	0.150564	3	2.3506e-05	2001	-3.46057	-1.89337	-10.6583	-4.89155	0.00189892
10	134735	25181	0.186893	6269.05	0.0480957	240802	1.78723	27.2288	0.000202092	1.14	8.46105e-06	2011	0.580665	-8.50679	-11.68	-1.67722	0.0449325	2010	134091
10	134091	24422.9	0.182137	6204.53	0.129399	245470	1.83062	24.7218	0.000184366	0.445531	3.3226e-06	2010	0.604654	-8.59859	-12.6148	-1.703	0.129946
10	133450	21358.4	0.160048	6251.01	0.0891891	239116	1.7918	25.6113	0.000191917	0.957132	7.17222e-06	2009	0.58322	-8.55845	-11.8453	-1.83228	0.0938484
10	132802	19548.9	0.147203	6396.38	0.30226	230362	1.73463	26.3827	0.000198662	2	1.506e-05	2008	0.550793	-8.52391	-11.1035	-1.91594	0.234685
10	132129	17368.3	0.131449	6207.57	0.149308	225169	1.70416	27.5866	0.000208785	3.50494	2.65266e-05	2007	0.533073	-8.4742	-10.5374	-2.02913	0.150223
10	131448	14313.1	0.108888	5756.49	0.0145002	197934	1.5058	30.3	0.000230509	2.89415	2.20174e-05	2006	0.409322	-8.37522	-10.7237	-2.21744	0.014093
10	130756	12091	0.0924698	4978.35	0.0548708	172232	1.3172	29.6208	0.000226535	17	0.000130013	2005	0.275509	-8.39261	-8.94787	-2.38087	0.100228
10	129988	9782.66	0.0752582	4550.25	0.00616816	153875	1.18376	29.3665	0.000225917	37.9159	0.000291687	2004	0.168698	-8.39534	-8.13983	-2.58683	0.00597308
10	129227	6989.33	0.0540857	3468.96	0.044646	141264	1.09315	246467	1.90724	5	3.86916e-05	2003	0.0890599	0.645658	-10.1599	-2.91719	0.0470746
10	128453	6141.97	0.0478149	259.27	0.00591662	132208	1.02923	230420	1.79381	5	3.89247e-05	2002	0.0288134	0.584341	-10.1539	-3.04042	0.00487064
10	127627	5309.73	0.0416035	2679.32	0.0205555	128974	1.01055	262581	2.05741	7	5.48473e-05	2001	0.0104989	0.721448	-9.81096	-3.17957	0.0192036
11	134735	12323.4	0.0914642	753.437	0.00578031	19878	0.147534	1.9266	1.42992e-05	0.38	2.82035e-06	2011	-1.9137	-11.1553	-12.7786	-2.39181	0.00540015	2011	134735
11	134091	11635.8	0.0867756	748.42	0.0156088	12038.6	0.0897793	1.11932	8.34747e-06	0.41654	3.1064e-06	2010	-2.4104	-11.6936	-12.682	-2.44443	0.0156748
11	133450	10019.4	0.0750796	713.08	0.0101742	14727.6	0.11036	1.24167	9.30438e-06	0.061694	4.623e-07	2009	-2.204	-11.585	-14.5871	-2.58921	0.0107057
11	132802	9044.19	0.0681028	725.34	0.0342759	15244	0.114787	1.1948	8.99685e-06	0.06	4.518e-07	2008	-2.16467	-11.6186	-14.61	-2.68674	0.0266129
11	132129	7440.88	0.0563152	676.268	0.0162659	14493.9	0.109695	1.23603	9.35475e-06	0.0646331	4.89167e-07	2007	-2.21005	-11.5796	-14.5306	-2.87679	0.0163657
11	131448	6072.35	0.0461958	622.677	0.00156849	13685	0.10411	2.1	1.59759e-05	0.98995	7.53111e-06	2006	-2.26231	-11.0444	-11.7965	-3.07487	0.00152443
11	130756	4948.46	0.037845	546.821	0.006027	9185	0.0702453	1.5314	1.17119e-05	1	7.64783e-06	2005	-2.65576	-11.3549	-11.7811	-3.27426	0.011009
11	129988	4171.13	0.0320886	472.821	0.000640941	11395	0.0876619	1.2956	9.96707e-06	0.242653	1.86673e-06	2004	-2.43427	-11.5162	-13.1913	-3.43926	0.000620669
11	129227	3114.41	0.0241003	399.443	0.00514089	5266	0.04075	9496	0.0734831	0.27	2.08935e-06	2003	-3.2003	-2.6107	-13.0787	-3.72553	0.00542053
11	128453	2685.73	0.0209083	2984.43	0.0681056	4392	0.0341915	9386	0.0730695	0.27	2.10194e-06	2002	-3.37578	-2.61634	-13.0727	-3.86761	0.0560654
11	127627	2371.67	0.0185828	332.84	0.00255352	3724	0.0291788	10518	0.082412	1	7.83533e-06	2001	-3.53431	-2.49602	-11.7569	-3.98552	0.00238558
12	134735	7784.45	0.057776	371.367	0.0028491	25785	0.191376	2.5602	1.90017e-05	0.15	1.1133e-06	2011	-1.65352	-10.871	-13.7082	-2.85118	0.00266172
12	134091	7199.03	0.0536876	392.19	0.00817938	28173.3	0.210106	1.40163	1.04528e-05	0.321874	2.40042e-06	2010	-1.56014	-11.4686	-12.9399	-2.92457	0.00821395
12	133450	5955.09	0.0446242	384.48	0.00548574	24964.3	0.187069	1.78354	1.33649e-05	0.150033	1.12426e-06	2009	-1.67628	-11.2229	-13.6984	-3.10948	0.00577232
12	132802	5359.9	0.0403601	388.73	0.0183694	26112	0.196624	1.7347	1.30623e-05	1	7.53001e-06	2008	-1.62646	-11.2458	-11.7966	-3.20991	0.0142626
12	132129	4811.3	0.0364137	375.327	0.00902755	23573.7	0.178414	1.74708	1.32225e-05	0.489771	3.70676e-06	2007	-1.72365	-11.2336	-12.5054	-3.31281	0.00908291
12	131448	3967.47	0.0301828	347.445	0.000875193	20340	0.154738	1.8	1.36936e-05	0.556327	4.2323e-06	2006	-1.86602	-11.1986	-12.3728	-3.50048	0.000850611
12	130756	3350.18	0.0256216	310.164	0.00341858	18338	0.140246	2.124	1.6244e-05	1.7	1.30013e-05	2005	-1.96436	-11.0278	-11.2505	-3.66432	0.00624445
12	129988	2843.96	0.0218786	279.277	0.000378579	16480	0.126781	1.7348	1.33458e-05	1.1614	8.93467e-06	2004	-2.06529	-11.2243	-11.6256	-3.82224	0.000366606
12	129227	2028.4	0.0156964	243.16	0.0031295	13106	0.101418	13832	0.107036	1	7.73832e-06	2003	-2.2885	-2.23459	-11.7693	-4.15432	0.00329974
12	128453	1633.41	0.012716	355.2	0.00810578	11874	0.0924385	16730	0.130242	1	7.78495e-06	2002	-2.38121	-2.03836	-11.7633	-4.36489	0.00667277
12	127627	1115.06	0.00873687	189.18	0.00145137	10905	0.0854443	14160	0.110948	1	7.83533e-06	2001	-2.45989	-2.19869	-11.7569	-4.7402	0.00135592
13	134735	7507.19	0.0557182	1097.31	0.00841845	3522	0.0261402	4.707	3.49352e-05	0.28	2.07815e-06	2011	-3.64428	-10.262	-13.084	-2.88745	0.00786479
13	134091	6418.94	0.04787	1035.62	0.0215985	5036	0.0375566	3.25664	2.42868e-05	0.234686	1.7502e-06	2010	-3.28191	-10.6256	-13.2558	-3.03927	0.0216898
13	133450	5077.63	0.038049	1049.09	0.0149684	6137.25	0.0459892	3.21396	2.40836e-05	0.2639	1.97752e-06	2009	-3.07935	-10.634	-13.1337	-3.26888	0.0157503
13	132802	4185.71	0.0315184	981.91	0.0464001	4653	0.0350371	3.5551	2.67699e-05	1	7.53001e-06	2008	-3.35135	-10.5282	-11.7966	-3.45718	0.0360266
13	132129	3193.77	0.0241716	828.881	0.0199367	4825.46	0.0365208	4.24484	3.21265e-05	0.823268	6.23079e-06	2007	-3.30987	-10.3458	-11.986	-3.72258	0.0200589
13	131448	2282.9	0.0173673	767.11	0.0019323	5223	0.0397343	4.7	3.57556e-05	0.40946	3.115e-06	2006	-3.22554	-10.2388	-12.6793	-4.05316	0.00187803
13	130756	1757.26	0.0134393	690.706	0.00761287	6569	0.0502386	4.792	3.66484e-05	1	7.64783e-06	2005	-2.99097	-10.2141	-11.7811	-4.30957	0.0139058
13	129988	1379.62	0.0106135	552.482	0.000748927	8355	0.0642752	4.4471	3.42116e-05	1.09258	8.40522e-06	2004	-2.74458	-10.2829	-11.6867	-4.54563	0.00072524
13	129227	938.14	0.00725963	420.512	0.00541204	6851	0.0530152	34955	0.270493	1	7.73832e-06	2003	-2.93718	-1.30751	-11.7693	-4.92543	0.00570644
13	128453	791.47	0.00616155	209.77	0.00478702	4047	0.0315057	32875	0.25593	1	7.78495e-06	2002	-3.45759	-1.36285	-11.7633	-5.08943	0.00394073
13	127627	703.87	0.00551506	320.88	0.00246177	3491	0.0273531	29614	0.232036	1	7.83533e-06	2001	-3.59892	-1.46086	-11.7569	-5.20027	0.00229986
14	134735	4443.42	0.032979	201.995	0.00154969	735	0.00545515	0.2873	2.13233e-06	0.11	8.16417e-07	2011	-5.21119	-13.0583	-14.0183	-3.41189	0.00144777
14	134091	3946.23	0.0294295	209.66	0.00437259	2146	0.0160041	0.22115	1.64925e-06	0.077314	5.76579e-07	2010	-4.13491	-13.3152	-14.3662	-3.52576	0.00439108
14	133450	3110.5	0.0233084	183.81	0.00262259	1855.89	0.013907	0.263391	1.9737e-06	0.03993	2.99213e-07	2009	-4.27536	-13.1356	-15.0221	-3.75894	0.0027596
14	132802	2791.79	0.0210222	181.801	0.00859099	1825	0.0137423	0.2351	1.7703e-06	0.02	1.506e-07	2008	-4.28728	-13.2444	-15.7086	-3.86218	0.00667033
14	132129	2276.77	0.0172314	147.815	0.00355532	1848.22	0.013988	0.344945	2.61067e-06	0.02455	1.85803e-07	2007	-4.26956	-12.8559	-15.4986	-4.06102	0.00357712
14	131448	1794.55	0.0136521	143.278	0.000360908	931	0.00708265	0.3	2.28227e-06	0.0393	2.98978e-07	2006	-4.95011	-12.9903	-15.0229	-4.29386	0.000350771
14	130756	1364.23	0.0104334	128.83	0.00141995	797	0.00609532	0.3634	2.77922e-06	0.14	1.0707e-06	2005	-5.10023	-12.7933	-13.7472	-4.56274	0.00259371
14	129988	1054.22	0.00811011	110.94	0.000150387	519	0.00399268	0.2357	1.81324e-06	0.138584	1.06613e-06	2004	-5.52329	-13.2204	-13.7515	-4.81464	0.00014563
14	129227	643.5	0.00497961	108.297	0.0013938	386	0.00298699	3170	0.0245305	0.14	1.08336e-06	2003	-5.81349	-3.70784	-13.7354	-5.3024	0.00146962
14	128453	478.83	0.00372767	324.27	0.00739994	298	0.00231991	2354	0.0183258	1	7.78495e-06	2002	-6.06622	-3.99945	-11.7633	-5.59197	0.00609172
14	127627	401.07	0.00314252	95.49	0.000732592	2947	0.0230907	4257	0.033355	1	7.83533e-06	2001	-3.76832	-3.40055	-11.7569	-5.76273	0.000684411
15	134735	10869.5	0.0806733	3983.51	0.0305612	382265	2.83716	54.2812	0.000402874	0.69	5.12116e-06	2011	1.0428	-7.81689	-12.1821	-2.51735	0.0285512
15	134091	9669.86	0.0721142	3961.92	0.0826284	393699	2.93606	50.8206	0.000379001	2.87151	2.14147e-05	2010	1.07707	-7.87797	-10.7514	-2.6295	0.0829776
15	133450	7923.31	0.0593729	4101	0.0585129	392604	2.94196	45.7366	0.000342724	4.74573	3.55619e-05	2009	1.07907	-7.97858	-10.2442	-2.82392	0.0615696
15	132802	7129.22	0.053683	3998.65	0.188956	407675	3.0698	46.2959	0.000348608	5	3.765e-05	2008	1.12161	-7.96156	-10.1872	-2.92466	0.146712
15	132129	6057.7	0.0458468	3342.68	0.0803998	424597	3.21351	49.1609	0.000372068	9.63168	7.2896e-05	2007	1.16736	-7.89644	-9.52648	-3.08245	0.0808928
15	131448	4870.01	0.037049	3443.68	0.00867441	374407	2.84833	42.8	0.000325604	6.83772	5.20185e-05	2006	1.04673	-8.02983	-9.86391	-3.29552	0.00843077
15	130756	4053.21	0.0309983	3274.13	0.036087	367422	2.80998	43.1323	0.000329869	8	6.11827e-05	2005	1.03318	-8.01682	-9.70165	-3.47382	0.0659172
15	129988	3301.43	0.025398	3081.35	0.00417698	318705	2.4518	39.0747	0.000300602	18.2726	0.000140571	2004	0.896824	-8.10972	-8.8698	-3.67309	0.00404487
15	129227	2223.15	0.0172034	2371.45	0.0305209	318336	2.46339	362882	2.8081	18	0.00013929	2003	0.901537	1.03251	-8.87895	-4.06265	0.0321811
15	128453	1882	0.0146513	87.95	0.00200705	319303	2.48576	350212	2.72638	32	0.000249118	2002	0.910577	1.00298	-8.29758	-4.22323	0.00165223
15	127627	1603.29	0.0125623	1937.27	0.0148626	309804	2.42742	426157	3.33908	65	0.000509297	2001	0.886828	1.2057	-7.58248	-4.37705	0.0138851
16	134735	3747.53	0.0278141	389.602	0.00298899	1303	0.00967084	0.4083	3.03039e-06	0.03	2.22659e-07	2011	-4.63864	-12.7068	-15.3176	-3.58221	0.00279242
16	134091	3522.7	0.026271	390.97	0.00815393	1578.2	0.0117696	0.29952	2.23371e-06	0.03	2.23729e-07	2010	-4.44223	-13.0118	-15.3128	-3.63929	0.0081884
16	133450	2958.46	0.022169	357.48	0.00510051	1783.47	0.0133644	0.267229	2.00246e-06	0.03	2.24803e-07	2009	-4.31516	-13.1211	-15.308	-3.80906	0.00536696
16	132802	2669.83	0.0201038	349.806	0.01653	1702	0.0128161	0.3727	2.80643e-06	0.07	5.271e-07	2008	-4.35706	-12.7836	-14.4559	-3.90685	0.0128345
16	132129	2160.13	0.0163486	323.534	0.0077818	1964.1	0.014865	0.243296	1.84136e-06	0.0664752	5.03108e-07	2007	-4.20875	-13.205	-14.5025	-4.11361	0.00782952
16	131448	1749.58	0.0133101	295.197	0.000743583	1199	0.00912148	0.2	1.52151e-06	0.03398	2.58505e-07	2006	-4.69712	-13.3958	-15.1683	-4.31923	0.000722698
16	130756	1476.36	0.011291	274.466	0.00302513	1618	0.0123742	0.245	1.87372e-06	0.03	2.29435e-07	2005	-4.39214	-13.1876	-15.2876	-4.48375	0.00552577
16	129988	1258.63	0.00968263	338.324	0.000458621	1379	0.0106087	0.2204	1.69554e-06	0.025031	1.92564e-07	2004	-4.54608	-13.2875	-15.4628	-4.63742	0.000444115
16	129227	997.74	0.00772083	365.093	0.0046988	1569	0.0121414	3203	0.0247858	0.03	2.3215e-07	2003	-4.41113	-3.69748	-15.2759	-4.86383	0.0049544
16	128453	807.35	0.00628518	2180.54	0.0497606	1276	0.00993359	2618	0.020381	18	0.000140129	2002	-4.61183	-3.89315	-8.87295	-5.06956	0.0409635
16	127627	694.75	0.0054436	201.73	0.00154766	1879	0.0147226	6191	0.0485085	18	0.000141036	2001	-4.21837	-3.02602	-8.8665	-5.21332	0.00144587
17	134735	2756.67	0.02046	232.757	0.0017857	1937	0.0143764	0.2321	1.72264e-06	0.08	5.93758e-07	2011	-4.24217	-13.2717	-14.3368	-3.88929	0.00166825
17	134091	2790.95	0.0208139	210.84	0.0043972	1070.8	0.00798562	0.10947	8.16386e-07	0.04005	2.98678e-07	2010	-4.83011	-14.0184	-15.0239	-3.87214	0.00441579
17	133450	2398.08	0.0179699	214.62	0.00306219	1238.52	0.00928081	0.114646	8.59097e-07	0.03105	2.32671e-07	2009	-4.67981	-13.9674	-15.2736	-4.01906	0.00322216
17	132802	2285.46	0.0172095	219.762	0.0103848	1273	0.0095857	0.0903	6.7996e-07	0.02	1.506e-07	2008	-4.64748	-14.2012	-15.7086	-4.06229	0.00806311
17	132129	1956.59	0.0148081	207.681	0.00499524	929.371	0.00703382	0.102298	7.7423e-07	0.02632	1.99199e-07	2007	-4.95703	-14.0714	-15.429	-4.21258	0.00502587
17	131448	1664.43	0.0126622	198.994	0.000501253	883	0.00671749	0.1	7.60757e-07	0.03137	2.3865e-07	2006	-5.00304	-14.089	-15.2483	-4.36913	0.000487174
17	130756	1422.42	0.0108784	195.889	0.00215907	862	0.00659243	0.2655	2.0305e-06	0.04	3.05913e-07	2005	-5.02183	-13.1072	-15	-4.52097	0.00394379
17	129988	1198.08	0.00921686	184.09	0.000249546	726	0.00558513	0.3742	2.87873e-06	0.044077	3.39085e-07	2004	-5.18765	-12.7582	-14.897	-4.68672	0.000241653
17	129227	893.71	0.00691581	147.439	0.00189756	694	0.00537039	1176	0.00910027	0.04	3.09533e-07	2003	-5.22685	-4.69945	-14.9882	-4.97394	0.00200078
17	128453	732.32	0.00570107	197.46	0.0045061	626	0.00487338	9361	0.0728749	0.03	2.33548e-07	2002	-5.32397	-2.61901	-15.2699	-5.1671	0.00370948
17	127627	626.45	0.00490844	130.67	0.00100249	876	0.00686375	3102	0.0243052	0.03	2.3506e-07	2001	-4.9815	-3.71706	-15.2634	-5.3168	0.000936559
18	134735	15099.9	0.112071	17057	0.13086	79587	0.590693	80.8113	0.00059978	8.38	6.21962e-05	2011	-0.526459	-7.41895	-9.68522	-2.18862	0.122254
18	134091	13750.1	0.102543	16582.7	0.345842	70024.3	0.522215	63.5334	0.000473808	2.36491	1.76366e-05	2010	-0.649676	-7.65471	-10.9455	-2.27747	0.347304
18	133450	11906.4	0.0892198	15328.3	0.218703	66406.3	0.497612	61.4235	0.000460273	2.88983	2.16548e-05	2009	-0.697935	-7.68369	-10.7403	-2.41665	0.230128
18	132802	11426.3	0.0860404	13747	0.649613	70496	0.530835	62.9183	0.000473775	51	0.00038403	2008	-0.633303	-7.65478	-7.86479	-2.45294	0.504382
18	132129	10844.5	0.082075	13176.5	0.316928	73126.4	0.553447	65.435	0.000495236	53.3702	0.000403925	2007	-0.59159	-7.61048	-7.81428	-2.50012	0.318872
18	131448	9663.27	0.073514	12360.1	0.0311343	70281	0.534668	66.1	0.00050286	37.4845	0.000285166	2006	-0.62611	-7.5952	-8.16244	-2.61028	0.0302599
18	130756	9032.75	0.0690809	11881.9	0.13096	68122	0.520986	70.8523	0.000541867	53	0.000405335	2005	-0.652033	-7.52049	-7.8108	-2.67248	0.239215
18	129988	8127.17	0.0625225	12173.8	0.0165025	61423	0.472528	67.9939	0.000523078	81.7095	0.000628593	2004	-0.749658	-7.55578	-7.37203	-2.77223	0.0159805
18	129227	2438.14	0.0188671	8991.34	0.11572	53762	0.416028	442085	3.421	63	0.000487514	2003	-0.877004	1.22993	-7.62619	-3.97034	0.122015
18	128453	2132.71	0.016603	154.52	0.0035262	54869	0.427152	372961	2.90348	74	0.000576086	2002	-0.850615	1.06591	-7.45925	-4.09817	0.00290281
18	127627	2007.81	0.0157319	7837.34	0.0601275	41741	0.327055	344303	2.69773	108	0.000846216	2001	-1.11763	0.99241	-7.07474	-4.15207	0.056173
19	134735	42050.7	0.312099	34713.1	0.266316	288331	2.13999	127.472	0.000946093	19.92	0.000147846	2011	0.760799	-6.96317	-8.81934	-1.16443	0.248801
19	134091	36362.9	0.271181	29688.9	0.619182	309006	2.30445	104.004	0.000775622	12.0969	9.02144e-05	2010	0.834843	-7.16184	-9.31332	-1.30497	0.621799
19	133450	30247.7	0.22666	28946.1	0.413001	297062	2.22601	97.516	0.000730731	15.1329	0.000113397	2009	0.800213	-7.22147	-9.08461	-1.48431	0.434576
19	132802	24507.4	0.184541	28961.1	1.36856	301935	2.27357	103.542	0.000779674	21	0.00015813	2008	0.821352	-7.15663	-8.75209	-1.68988	1.06259
19	132129	21506.7	0.162771	27245.3	0.655317	324026	2.45234	111.617	0.000844761	34.3204	0.000259749	2007	0.897044	-7.07646	-8.25579	-1.81541	0.659336
19	131448	17034.2	0.129589	24779	0.0624168	335956	2.55581	111.5	0.000848244	46.2267	0.000351673	2006	0.938369	-7.07234	-7.95281	-2.04339	0.0606637
19	130756	13682.5	0.104641	22494.1	0.247927	339052	2.59301	116.755	0.000892927	70	0.000535348	2005	0.95282	-7.02101	-7.53259	-2.25722	0.452868
19	129988	11615.2	0.0893558	20346.9	0.0275816	323233	2.48664	103.383	0.000795326	102.961	0.000792078	2004	0.910931	-7.13676	-7.14085	-2.41513	0.0267092
19	129227	8732.6	0.0675757	17108.2	0.220185	312825	2.42074	832677	6.44352	111	0.000858954	2003	0.884073	1.86308	-7.0598	-2.69451	0.232162
19	128453	7212.97	0.0561526	8478.69	0.193486	321416	2.50221	735844	5.72851	104	0.000809635	2002	0.917173	1.74546	-7.11893	-2.87968	0.15928
19	127627	6156.48	0.0482381	12886.5	0.0988638	330514	2.58969	786180	6.15998	115	0.000901063	2001	0.951537	1.81807	-7.01194	-3.03161	0.0923618
20	134735	13592.2	0.100881	1523.16	0.0116856	48586	0.360604	10.4078	7.72464e-05	0.95	7.05088e-06	2011	-1.01997	-9.46851	-11.8624	-2.29382	0.010917
20	134091	10948.4	0.0816494	1427.68	0.0297752	52605.5	0.392312	7.93947	5.92096e-05	1.42427	1.06217e-05	2010	-0.935698	-9.73443	-11.4526	-2.50532	0.029901
20	133450	9090.92	0.0681223	1354.58	0.0193271	52718.4	0.395042	7.76131	5.8159e-05	1.6845	1.26227e-05	2009	-0.928763	-9.75233	-11.28	-2.68645	0.0203367
20	132802	7592.49	0.0571715	1360.49	0.0642899	47960	0.361139	7.6271	5.74321e-05	3	2.259e-05	2008	-1.01849	-9.76491	-10.698	-2.8617	0.0499169
20	132129	6363.7	0.0481628	1183.14	0.0284574	42893.3	0.324632	7.82072	5.919e-05	2.49722	1.88998e-05	2007	-1.12506	-9.73476	-10.8764	-3.03317	0.0286319
20	131448	5125.79	0.0389948	1161.06	0.00292465	42988	0.327034	7.3	5.55353e-05	2.58807	1.96889e-05	2006	-1.11769	-9.79849	-10.8355	-3.24433	0.0028425
20	130756	4280.17	0.032734	1122.39	0.0123709	40050	0.306296	6.4227	4.91197e-05	3	2.29435e-05	2005	-1.1832	-9.92125	-10.6825	-3.41934	0.0225968
20	129988	3650.9	0.0280864	1040.6	0.0014106	42982	0.330661	8.9893	6.91548e-05	6.51386	5.01112e-05	2004	-1.10666	-9.57916	-9.90127	-3.57247	0.00136599
20	129227	3895.63	0.0301456	1025.78	0.0132019	35874	0.277605	68333	0.528783	6	4.64299e-05	2003	-1.28156	-0.637178	-9.97757	-3.50172	0.01392
20	128453	3167.17	0.0246563	14507.7	0.331071	36691	0.285638	62865	0.489401	4	3.11398e-05	2002	-1.25303	-0.714574	-10.377	-3.70272	0.272542
20	127627	2645.3	0.0207268	841.15	0.00645324	32634	0.255698	65301	0.511655	4	3.13413e-05	2001	-1.36376	-0.670105	-10.3706	-3.87633	0.00602882
21	134735	4906.25	0.0364141	1530.4	0.0117411	41428	0.307478	12.1463	9.01496e-05	8.67	6.43485e-05	2011	-1.17935	-9.31404	-9.6512	-3.3128	0.0109689
21	134091	4083.24	0.0304513	1440.91	0.0300511	42370.5	0.315983	10.6883	7.97097e-05	1.4798	1.10358e-05	2010	-1.15207	-9.43712	-11.4144	-3.49163	0.0301781
21	133450	3599.71	0.0269742	1436.85	0.0205009	43854.8	0.328624	11.4553	8.58398e-05	0.0914	6.84901e-07	2009	-1.11284	-9.36303	-14.194	-3.61287	0.0215719
21	132802	3377.32	0.0254312	1448.58	0.0684524	48087	0.362095	11.7031	8.81244e-05	0.56	4.2168e-06	2008	-1.01585	-9.33676	-12.3764	-3.67178	0.0531487
21	132129	3484.43	0.0263714	1553.97	0.0373769	48957	0.370524	12.1795	9.21786e-05	0.5582	4.22466e-06	2007	-0.992836	-9.29178	-12.3746	-3.63547	0.0376061
21	131448	2800.04	0.0213015	1423.97	0.00358688	49543	0.376902	13.2	0.00010042	1.84545	1.40394e-05	2006	-0.97577	-9.20615	-11.1736	-3.84898	0.00348614
21	130756	2305.7	0.0176336	1342	0.0147913	48516	0.371042	11.5248	8.81397e-05	1	7.64783e-06	2005	-0.991439	-9.33659	-11.7811	-4.03795	0.0270181
21	129988	1876.93	0.0144392	1303.03	0.00176635	47467	0.365164	11.5828	8.91067e-05	1.70693	1.31314e-05	2004	-1.00741	-9.32568	-11.2405	-4.23781	0.00171048
21	129227	1743.87	0.0134946	2199.87	0.0283126	48847	0.377994	127620	0.987565	1	7.73832e-06	2003	-0.972878	-0.0125134	-11.7693	-4.30546	0.0298527
21	128453	1472.76	0.0114654	845.44	0.0192932	53954	0.420029	113473	0.883381	3	2.33548e-05	2002	-0.867431	-0.123998	-10.6647	-4.46842	0.0158824
21	127627	1263.06	0.0098965	1705.02	0.0130808	59695	0.46773	127604	0.99982	7	5.48473e-05	2001	-0.759864	-0.000180229	-9.81096	-4.61557	0.0122205
22	134735	5390.39	0.0400073	1521.16	0.0116702	12155	0.0902141	8.112	6.02071e-05	0.29	2.15237e-06	2011	-2.40557	-9.71772	-13.0489	-3.21869	0.0109027
22	134091	4776.74	0.0356231	1461.17	0.0304736	7042.4	0.0525196	3.94753	2.94392e-05	0.369412	2.75494e-06	2010	-2.94657	-10.4332	-12.8021	-3.33476	0.0306024
22	133450	4000.76	0.0299795	1344.72	0.0191864	6783.47	0.0508315	3.77963	2.83224e-05	0.279596	2.09514e-06	2009	-2.97924	-10.4719	-13.0759	-3.50724	0.0201887
22	132802	3533.01	0.0266036	1335.83	0.0631247	6447	0.048546	3.8203	2.87669e-05	0.3	2.259e-06	2008	-3.02524	-10.4563	-13.0006	-3.62671	0.0490121
22	132129	3034.6	0.022967	1259.12	0.030285	6434.57	0.0486992	4.48847	3.39703e-05	0.291609	2.207e-06	2007	-3.02209	-10.29	-13.0239	-3.7737	0.0304707
22	131448	2473.32	0.018816	1180.25	0.00297297	5976	0.0454628	4.6	3.49948e-05	0.410873	3.12575e-06	2006	-3.09086	-10.2603	-12.6758	-3.97305	0.00288947
22	130756	2082.33	0.0159253	1079.38	0.0118968	6118	0.0467894	4.4301	3.38807e-05	0.4	3.05913e-06	2005	-3.0621	-10.2927	-12.6974	-4.13985	0.021731
22	129988	1737.45	0.0133662	883.721	0.00119794	6028	0.0463735	3.8438	2.95704e-05	0.4145	3.18876e-06	2004	-3.07103	-10.4287	-12.6559	-4.31503	0.00116005
22	129227	1341.99	0.0103847	738.485	0.00950441	6865	0.0531236	41060	0.317735	1	7.73832e-06	2003	-2.93513	-1.14654	-11.7693	-4.56742	0.0100214
22	128453	1105.83	0.00860883	1942.76	0.0443344	7579	0.0590021	40935	0.318677	1	7.78495e-06	2002	-2.83018	-1.14358	-11.7633	-4.75497	0.0364966
22	127627	950.5	0.00744748	645.87	0.00495506	7070	0.0553958	44791	0.350952	1	7.83533e-06	2001	-2.89325	-1.0471	-11.7569	-4.89988	0.00462918
23	134735	12748.3	0.0946179	2016.73	0.0154722	26075	0.193528	0.000294516	2.18589e-09	0.0539188	4.00184e-07	2011	-1.64233	-19.9412	-14.7313	-2.35791	0.0144546
23	134091	11879.3	0.0885913	2097.51	0.0437449	4962.2	0.0370062	2.94516	2.19639e-05	0.0539188	4.02106e-07	2010	-3.29667	-10.7261	-14.7265	-2.42372	0.0439298
23	133450	9607.7	0.0719947	1894.96	0.0270372	4387.48	0.0328773	2.33959	1.75316e-05	0.0818712	6.13497e-07	2009	-3.41497	-10.9515	-14.3041	-2.63116	0.0284496
23	132802	8330.48	0.0627286	1852.37	0.0875334	4842	0.0364603	2.4196	1.82196e-05	0.3	2.259e-06	2008	-3.31153	-10.913	-13.0006	-2.76894	0.0679639
23	132129	7016.1	0.0531004	1625.99	0.0391091	4147.66	0.031391	2.47546	1.87352e-05	0.259001	1.96021e-06	2007	-3.46123	-10.8851	-13.1425	-2.93557	0.0393489
23	131448	5623.51	0.0427813	1557.66	0.00392366	3374	0.0256679	2	1.52151e-05	0.084416	6.42201e-07	2006	-3.66251	-11.0932	-14.2584	-3.15166	0.00381346
23	130756	4510.94	0.0344989	1446.81	0.0159466	2288	0.0174982	1.3027	9.96283e-06	0.07	5.35348e-07	2005	-4.04565	-11.5166	-14.4403	-3.36683	0.0291283
23	129988	3817.35	0.0293669	1129.29	0.00153082	2809	0.0216097	1.1631	8.94775e-06	0.06866	5.28203e-07	2004	-3.83461	-11.6241	-14.4538	-3.52789	0.00148241
23	129227	3017.57	0.0233509	818.611	0.0105356	2344	0.0181386	9546	0.07387	0.07	5.41682e-07	2003	-4.00971	-2.60545	-14.4286	-3.75712	0.0111087
23	128453	2478.21	0.0192927	643.59	0.0146869	2476	0.0192755	11971	0.0931936	11	8.56344e-05	2002	-3.94892	-2.37308	-9.36542	-3.94803	0.0120905
23	127627	2114.37	0.0165668	658.83	0.00505449	2588	0.0202778	13163	0.103136	11	8.61887e-05	2001	-3.89823	-2.2717	-9.35897	-4.10036	0.00472207
24	134735	31927.7	0.236966	30015	0.230272	121037	0.898334	201.689	0.00149693	21.71	0.000161131	2011	-0.107214	-6.50434	-8.73329	-1.43984	0.215128
24	134091	27253	0.203243	27683.2	0.577352	32313.1	0.240979	168.618	0.00125749	26.9758	0.000201175	2010	-1.42305	-6.67864	-8.51134	-1.59336	0.579792
24	133450	21560	0.161558	26882.3	0.383555	32777.1	0.245613	160.524	0.00120287	35.0511	0.000262653	2009	-1.404	-6.72304	-8.24468	-1.82289	0.403592
24	132802	18153.3	0.136694	25460.5	1.20313	35840	0.269875	168.062	0.00126551	38	0.00028614	2008	-1.30979	-6.67228	-8.15903	-1.99001	0.934154
24	132129	14552	0.110135	20354.8	0.489585	40264.9	0.30474	182.616	0.0013821	61.2047	0.000463219	2007	-1.1883	-6.58415	-7.67731	-2.20605	0.492587
24	131448	11105.1	0.0844827	19948.4	0.0502488	43070	0.327658	186.7	0.00142033	85.2206	0.000648322	2006	-1.11578	-6.55686	-7.34112	-2.47121	0.0488374
24	130756	8842.34	0.0676247	18849.9	0.207762	48248	0.368993	178.365	0.0013641	169	0.00129248	2005	-0.996979	-6.59726	-6.65119	-2.69378	0.379501
24	129988	7184.29	0.0552689	18088.4	0.02452	47814	0.367834	174.837	0.00134503	68.7518	0.000528909	2004	-1.00012	-6.61134	-7.54469	-2.89555	0.0237445
24	129227	5031.92	0.0389386	12656.1	0.162886	27718	0.214491	1553792	12.0237	82	0.000634542	2003	-1.53949	2.48688	-7.36261	-3.24577	0.171746
24	128453	4136.4	0.0322017	702.84	0.016039	44483	0.346298	1550006	12.0667	74	0.000576086	2002	-1.06046	2.49045	-7.45925	-3.43574	0.0132035
24	127627	3614.92	0.0283241	9980.87	0.0765724	46197	0.361969	1573617	12.3298	57	0.000446614	2001	-1.0162	2.51202	-7.71382	-3.56404	0.0715365
25	134735	41943.9	0.311306	58896.6	0.45185	33545	0.24897	251.449	0.00186625	18.54	0.000137603	2011	-1.39042	-6.28382	-8.89113	-1.16698	0.422133
25	134091	37263.9	0.2779	57533.7	1.1999	116948	0.872152	176.651	0.0013174	10.5512	7.86869e-05	2010	-0.136792	-6.6321	-9.45003	-1.28049	1.20497
25	133450	32920	0.246684	56404.4	0.804775	125978	0.944011	170.184	0.00127526	49.9082	0.000373984	2009	-0.0576171	-6.6646	-7.8913	-1.39965	0.846816
25	132802	28981.8	0.218234	51862.9	2.45078	144104	1.0851	160.747	0.00121043	53	0.00039909	2008	0.081676	-6.71678	-7.82632	-1.52219	1.90287
25	132129	26149	0.197905	47774.4	1.14909	156862	1.18719	162.47	0.00122963	60.4748	0.000457695	2007	0.171589	-6.70104	-7.68931	-1.61997	1.15614
25	131448	21267	0.16179	42812.3	0.107842	156727	1.19231	149.4	0.00113657	121.13	0.000921502	2006	0.175894	-6.77974	-6.98951	-1.82145	0.104813
25	130756	17255.6	0.131968	35988.2	0.396658	169934	1.29963	142.238	0.00108782	149	0.00113953	2005	0.262077	-6.82358	-6.77714	-2.02519	0.724543
25	129988	13237.3	0.101835	29702.5	0.0402637	186888	1.43773	113.409	0.000872458	206.318	0.00158721	2004	0.363067	-7.0442	-6.44578	-2.2844	0.0389903
25	129227	6514.89	0.0504143	24069.7	0.30978	177456	1.37321	832359	6.44106	234	0.00181077	2003	0.317152	1.86269	-6.314	-2.98748	0.326631
25	128453	4863.93	0.0378654	10624.6	0.242458	190268	1.48123	813924	6.33636	306	0.00238219	2002	0.392871	1.8463	-6.03973	-3.27372	0.199594
25	127627	4196.71	0.0328826	17136.3	0.131469	191745	1.50239	732578	5.73999	254	0.00199017	2001	0.407054	1.74746	-6.21953	-3.41481	0.122822
26	134735	18122.6	0.134505	13991.1	0.107339	29912	0.222006	114.627	0.00085076	4.1	3.04301e-05	2011	-1.50505	-7.06938	-10.4001	-2.00615	0.100279
26	134091	16033.1	0.119569	12841.5	0.267817	31118.2	0.232068	80.3326	0.00059909	26.6752	0.000198933	2010	-1.46073	-7.4201	-8.52254	-2.12386	0.268949
26	133450	13750.1	0.103036	11401.4	0.162674	28976	0.21713	66.089	0.000495234	40.0896	0.00030041	2009	-1.52726	-7.61048	-8.11036	-2.27268	0.171172
26	132802	11680.3	0.0879529	11288	0.533413	30175	0.227218	66.8786	0.000503596	25	0.00018825	2008	-1.48185	-7.59374	-8.57774	-2.43095	0.41416
26	132129	9733.26	0.0736648	10686.4	0.257034	31806.6	0.240724	68.3648	0.000517409	32.6567	0.000247158	2007	-1.4241	-7.56668	-8.30548	-2.60823	0.25861
26	131448	7953.48	0.0605066	8633.32	0.0217468	32751	0.249156	69.5	0.000528726	34.7857	0.000264634	2006	-1.38968	-7.54504	-8.23716	-2.805	0.021136
26	130756	5978.4	0.0457218	7188.69	0.0792328	33734	0.257992	70.7	0.000540702	40	0.000305913	2005	-1.35483	-7.52264	-8.09221	-3.08518	0.144728
26	129988	4837.66	0.0372162	6403.53	0.00868042	35565	0.273602	70.3637	0.000541309	59.053	0.000454296	2004	-1.29608	-7.52152	-7.69676	-3.29101	0.00840588
26	129227	3095.39	0.0239531	5408.79	0.0696119	31761	0.245777	581653	4.50102	65	0.000502991	2003	-1.40333	1.5043	-7.59494	-3.73166	0.0733985
26	128453	2415.37	0.0188035	19327.5	0.441059	34050	0.265077	672428	5.23482	42	0.000326968	2002	-1.32773	1.65533	-8.02565	-3.97371	0.363085
26	127627	2120.56	0.0166153	3892.76	0.0298649	37451	0.293441	612338	4.79787	37	0.000289907	2001	-1.22608	1.56817	-8.14595	-4.09743	0.0279008
27	134735	18444.8	0.136897	3533.37	0.0271077	11973	0.0888633	5.8336	4.32968e-05	0.5	3.71099e-06	2011	-2.42066	-10.0474	-12.5042	-1.98852	0.0253249
27	134091	16561.1	0.123506	3627.75	0.0756591	30151.5	0.224858	3.50332	2.61264e-05	0.178119	1.32835e-06	2010	-1.49228	-10.5526	-13.5316	-2.09146	0.0759789
27	133450	13446.8	0.100763	3037.78	0.0433429	31345.8	0.234888	3.83747	2.87559e-05	0.22378	1.67688e-06	2009	-1.44865	-10.4567	-13.2986	-2.29499	0.0456071
27	132802	12162.7	0.0915853	3023.79	0.142889	28252	0.212738	4.2277	3.18346e-05	0.9	6.77701e-06	2008	-1.5477	-10.355	-11.902	-2.39048	0.110944
27	132129	9884.21	0.0748072	2832.47	0.0681279	33335.3	0.252294	5.18676	3.92553e-05	0.869263	6.5789e-06	2007	-1.37716	-10.1454	-11.9316	-2.59284	0.0685457
27	131448	7556.43	0.0574861	2576.02	0.00648884	22448	0.170775	4	3.04303e-05	1.23731	9.41289e-06	2006	-1.76741	-10.4001	-11.5734	-2.85621	0.00630659
27	130756	5866.85	0.0448687	2220.38	0.0244727	21057	0.16104	2.5533	1.95272e-05	2	1.52957e-05	2005	-1.8261	-10.8437	-11.0879	-3.10401	0.0447024
27	129988	4846.95	0.0372877	1966.62	0.00266588	15880	0.122165	3.1405	2.41599e-05	1.32997	1.02315e-05	2004	-2.10238	-10.6308	-11.49	-3.28909	0.00258156
27	129227	3606.21	0.027906	1699.29	0.0218701	15910	0.123117	23552	0.182253	2	1.54766e-05	2003	-2.09462	-1.70236	-11.0762	-3.57891	0.0230598
27	128453	3160.19	0.0246019	4372.95	0.0997921	14124	0.109955	28295	0.220275	19	0.000147914	2002	-2.20769	-1.51288	-8.81888	-3.70493	0.0821501
27	127627	2699.06	0.021148	1229.4	0.00943186	11742	0.0920025	28527	0.223519	2	1.56707e-05	2001	-2.38594	-1.49826	-11.0637	-3.85621	0.00881155
28	134735	36220.7	0.268829	3823.13	0.0293307	6454	0.0479014	2.7042	2.00705e-05	6.43	4.77233e-05	2011	-3.03861	-10.8163	-9.95009	-1.31368	0.0274017
28	134091	31869.8	0.237673	3270.81	0.0682149	13055.1	0.09736	5.04746	3.7642e-05	1.12419	8.38379e-06	2010	-2.32934	-10.1874	-11.6892	-1.43686	0.0685032
28	133450	24845.1	0.186176	2985.24	0.0425933	13452.3	0.100804	4.61795	3.46044e-05	2.35385	1.76384e-05	2009	-2.29458	-10.2715	-10.9454	-1.68106	0.0448183
28	132802	22114.5	0.166522	2758.11	0.130334	14291	0.107611	4.7627	3.58632e-05	2	1.506e-05	2008	-2.22923	-10.2358	-11.1035	-1.79263	0.101196
28	132129	17288	0.130841	2586.52	0.0622123	12182.4	0.0922007	4.02098	3.04322e-05	4.43014	3.35289e-05	2007	-2.38379	-10.4	-10.3031	-2.03377	0.0625938
28	131448	13061.4	0.0993656	2335.61	0.00588326	12530	0.0953229	5.4	4.10809e-05	13.5407	0.000103012	2006	-2.35049	-10.1	-9.18067	-2.30895	0.00571802
28	130756	10110.4	0.0773225	1982.12	0.0218467	15652	0.119704	5.5427	4.23896e-05	12	9.1774e-05	2005	-2.12273	-10.0686	-9.29618	-2.55977	0.0399056
28	129988	7914.64	0.0608875	1705.51	0.00231194	19600	0.150783	6.6069	5.0827e-05	8.3083	6.39159e-05	2004	-1.89191	-9.88708	-9.65794	-2.79873	0.00223882
28	129227	5636.86	0.0436198	1523.24	0.0196044	13467	0.104212	39550	0.306051	23	0.000177981	2003	-2.26133	-1.184	-8.63383	-3.13224	0.0206708
28	128453	4201.58	0.0327091	1481.75	0.033814	12571	0.0978646	32230	0.250909	6	4.67097e-05	2002	-2.32417	-1.38267	-9.97156	-3.4201	0.0278361
28	127627	3422.73	0.0268182	1161.52	0.00891109	15357	0.120327	41925	0.328496	10	7.83533e-05	2001	-2.11754	-1.11323	-9.45428	-3.61867	0.00832503
29	134735	23139.9	0.171744	1887.05	0.0144773	15069	0.111842	1.643	1.21943e-05	0.4	2.96879e-06	2011	-2.19067	-11.3145	-12.7274	-1.76175	0.0135251
29	134091	19364.4	0.144413	1851.2	0.038608	9714.4	0.0724463	3.91124	2.91685e-05	1.36845	1.02054e-05	2010	-2.62491	-10.4424	-11.4926	-1.93508	0.0387712
29	133450	15256.3	0.114322	1671.52	0.0238492	11006.4	0.0824762	3.83117	2.87087e-05	1.93153	1.44738e-05	2009	-2.49525	-10.4583	-11.1432	-2.16874	0.025095
29	132802	13204.5	0.0994299	1630.28	0.0770387	10513	0.079163	2.0955	1.57791e-05	1	7.53001e-06	2008	-2.53625	-11.0568	-11.7966	-2.3083	0.0598154
29	132129	9951.25	0.0753147	1441.14	0.0346631	9439.08	0.0714383	2.50491	1.8958e-05	1.29046	9.76667e-06	2007	-2.63892	-10.8733	-11.5365	-2.58608	0.0348756
29	131448	7584.28	0.057698	1344.21	0.00338598	11506	0.0875327	2.3	1.74974e-05	3.07616	2.34021e-05	2006	-2.43574	-10.9535	-10.6627	-2.85253	0.00329088
29	130756	5872.71	0.0449135	1242.52	0.0136949	11324	0.0866041	3.2803	2.50872e-05	11	8.41262e-05	2005	-2.44641	-10.5932	-9.38319	-3.10302	0.0250154
29	129988	4868.95	0.0374569	1146.52	0.00155419	10455	0.0804305	3.14	2.41561e-05	3.819	2.93796e-05	2004	-2.52036	-10.631	-10.4352	-3.28456	0.00150503
29	129227	3645.31	0.0282086	924.09	0.0118932	14038	0.108631	36237	0.280414	4	3.09533e-05	2003	-2.2198	-1.27149	-10.383	-3.56813	0.0125401
29	128453	2721.09	0.0211835	1325.07	0.0302385	13805	0.107471	39599	0.308276	4	3.11398e-05	2002	-2.23053	-1.17676	-10.377	-3.85453	0.0248927
29	127627	2258.33	0.0176948	754.33	0.00578716	13504	0.105808	26653	0.208835	5	3.91767e-05	2001	-2.24613	-1.56621	-10.1474	-4.03449	0.00540655
30	134735	64053.8	0.475406	3995.63	0.0306542	13326	0.0989053	3.0259	2.24582e-05	0.53	3.93365e-06	2011	-2.31359	-10.7039	-12.4459	-0.743587	0.0286381
30	134091	56356.3	0.420284	3748.85	0.0781847	26219.4	0.195534	3.3874	2.52619e-05	1.06861	7.96932e-06	2010	-1.63202	-10.5862	-11.7399	-0.866824	0.0785151
30	133450	42550.3	0.318849	3031.9	0.043259	27421.8	0.205484	3.68444	2.76092e-05	2.00799	1.50468e-05	2009	-1.58239	-10.4974	-11.1043	-1.14304	0.0455189
30	132802	34014.1	0.256126	2732.58	0.129128	28524	0.214786	4.2056	3.16682e-05	2	1.506e-05	2008	-1.53811	-10.3602	-11.1035	-1.36209	0.100259
30	132129	28076.2	0.212491	2376.95	0.0571716	22047.6	0.166864	4.10454	3.10646e-05	1.16179	8.79285e-06	2007	-1.79057	-10.3794	-11.6416	-1.54886	0.0575222
30	131448	21101.4	0.16053	2134.25	0.00537604	25708	0.195575	3.9	2.96695e-05	5.22388	3.9741e-05	2006	-1.63181	-10.4254	-10.1331	-1.82927	0.00522504
30	130756	16187.4	0.123799	1950.44	0.0214975	24653	0.188542	4.0988	3.13469e-05	4	3.05913e-05	2005	-1.66843	-10.3704	-10.3948	-2.0891	0.0392678
30	129988	13709.9	0.10547	2079.64	0.00281909	40202	0.309275	5.5452	4.26593e-05	6.95914	5.35368e-05	2004	-1.17353	-10.0623	-9.83514	-2.24933	0.00272993
30	129227	11935.1	0.0923579	1653.76	0.0212841	40805	0.315762	70041	0.542	8	6.19066e-05	2003	-1.15277	-0.61249	-9.68988	-2.38208	0.0224418
30	128453	8865.89	0.0690205	782.46	0.017856	24493	0.190677	50923	0.396433	6	4.67097e-05	2002	-1.65718	-0.925248	-9.97156	-2.67335	0.0146993
30	127627	6730.56	0.0527362	1440.51	0.0110515	24251	0.190015	50476	0.395496	8	6.26827e-05	2001	-1.66065	-0.927614	-9.67743	-2.94245	0.0103246
31	134735	42234.9	0.313467	2276.48	0.017465	9631	0.0714811	0.9429	6.99818e-06	0.07	5.19538e-07	2011	-2.63832	-11.8699	-14.4703	-1.16006	0.0163163
31	134091	36716.7	0.273819	2121.53	0.0442459	11652.4	0.0868992	1.34883	1.00591e-05	0.0238102	1.77568e-07	2010	-2.44301	-11.507	-15.5439	-1.29529	0.0444329
31	133450	29496.9	0.221033	1854.48	0.0264596	9324.47	0.0698724	1.13301	8.49012e-06	0.083462	6.25418e-07	2009	-2.66108	-11.6766	-14.2848	-1.50944	0.0278419
31	132802	25269.2	0.190277	1791.1	0.0846382	9927	0.0747504	1.4218	1.07062e-05	0.39	2.9367e-06	2008	-2.5936	-11.4447	-12.7382	-1.65927	0.065716
31	132129	20155.7	0.152546	1543.42	0.0371232	8659.56	0.0655387	1.23105	9.31704e-06	0.385835	2.92014e-06	2007	-2.72511	-11.5837	-12.7439	-1.88029	0.0373508
31	131448	15807.7	0.120258	1323	0.00333255	8239	0.0626788	1	7.60757e-06	0.355365	2.70346e-06	2006	-2.76973	-11.7864	-12.821	-2.11811	0.00323895
31	130756	12992.1	0.0993616	1191.25	0.0131298	8108	0.0620086	2.7223	2.08197e-05	1	7.64783e-06	2005	-2.78048	-10.7796	-11.7811	-2.30899	0.0239832
31	129988	10521.5	0.0809424	1119.35	0.00151736	7964	0.0612672	1.2921	9.94015e-06	1.31161	1.00902e-05	2004	-2.79251	-11.5189	-11.5039	-2.51402	0.00146937
31	129227	9026.2	0.0698476	889.743	0.0114511	10253	0.079341	18086	0.139955	1	7.73832e-06	2003	-2.534	-1.96643	-11.7693	-2.66144	0.012074
31	128453	6990.67	0.054422	1555.65	0.0355004	11207	0.0872459	29228	0.227538	1	7.78495e-06	2002	-2.43902	-1.48044	-11.7633	-2.91099	0.0292244
31	127627	6088.41	0.0477047	593.64	0.00455436	11294	0.0884922	30823	0.241508	2	1.56707e-05	2001	-2.42484	-1.42085	-11.0637	-3.04272	0.00425483
32	134735	82242.9	0.610405	2623.39	0.0201264	44961	0.333699	0.7954	5.90344e-06	0.27	2.00393e-06	2011	-1.09751	-12.04	-13.1204	-0.493633	0.0188028
32	134091	69632.7	0.519294	2525.15	0.0526636	35965.2	0.268215	0.65231	4.86468e-06	0.116147	8.66177e-07	2010	-1.31597	-12.2335	-13.9592	-0.655284	0.0528862
32	133450	55511.5	0.415973	2216.28	0.0316218	33513.3	0.25113	1.00407	7.52396e-06	0.255335	1.91334e-06	2009	-1.38179	-11.7974	-13.1667	-0.877136	0.0332737
32	132802	52354.4	0.394229	2197.44	0.10384	31862	0.239921	1.1435	8.61056e-06	0.4	3.012e-06	2008	-1.42745	-11.6625	-12.7129	-0.930824	0.0806247
32	132129	45965.4	0.347883	2007.02	0.0482739	29621.1	0.224183	1.60823	1.21717e-05	0.395753	2.9952e-06	2007	-1.49529	-11.3164	-12.7185	-1.05589	0.04857
32	131448	37793.7	0.287518	1742.93	0.00439034	23905	0.181859	1.8	1.36936e-05	2.51184	1.9109e-05	2006	-1.70452	-11.1986	-10.8654	-1.24647	0.00426703
32	130756	29794.5	0.227864	1474.41	0.0162507	18745	0.143359	1.6982	1.29875e-05	0.3	2.29435e-06	2005	-1.94241	-11.2515	-12.9851	-1.47901	0.0296839
32	129988	22515.8	0.173215	1272.02	0.00172431	14214	0.109349	1.3394	1.0304e-05	0.310598	2.38944e-06	2004	-2.21321	-11.483	-12.9445	-1.75322	0.00166978
32	129227	22385.9	0.173229	1044.36	0.013441	13214	0.102254	18053	0.1397	1	7.73832e-06	2003	-2.28029	-1.96826	-11.7693	-1.75314	0.0141722
32	128453	16389.8	0.127594	725.47	0.0165555	16936	0.131846	13807	0.107487	1	7.78495e-06	2002	-2.02612	-2.23039	-11.7633	-2.0589	0.0136287
32	127627	13169.1	0.103184	683.26	0.00524192	15148	0.11869	15306	0.119928	1	7.83533e-06	2001	-2.13124	-2.12087	-11.7569	-2.27124	0.00489717
33	134735	8143.7	0.0604423	318.389	0.00244266	2242	0.0166401	0.0923	6.85048e-07	0.01	7.42198e-08	2011	-4.09594	-14.1938	-16.4162	-2.80607	0.00228201
33	134091	6810.9	0.0507931	346.47	0.00722586	4965.3	0.0370293	0.14008	1.04466e-06	0.01	7.45762e-08	2010	-3.29604	-13.7718	-16.4114	-2.97999	0.0072564
33	133450	5363.93	0.0401943	291.92	0.0041651	5798.16	0.0434482	0.143455	1.07497e-06	0.024915	1.86699e-07	2009	-3.13619	-13.7432	-15.4938	-3.21403	0.00438269
33	132802	5212.32	0.0392488	284.976	0.0134665	5756	0.0433427	0.1816	1.36745e-06	0.001	7.53001e-09	2008	-3.13862	-13.5026	-18.7044	-3.23783	0.0104558
33	132129	4516.16	0.0341799	259.092	0.00623182	7194.64	0.0544517	0.18159	1.37434e-06	0.009348	7.0749e-08	2007	-2.91044	-13.4975	-16.4641	-3.37612	0.00627004
33	131448	3669.48	0.0279158	228.203	0.00057483	7845	0.0596814	1.6	1.21721e-05	0.0235	1.78778e-07	2006	-2.81873	-11.3164	-15.5371	-3.57856	0.000558685
33	130756	2860.3	0.0218751	194.181	0.00214023	7241	0.055378	1.2981	9.92765e-06	0.9	6.88305e-06	2005	-2.89357	-11.5202	-11.8864	-3.82241	0.00390939
33	129988	2242.75	0.0172535	171.549	0.000232546	9902	0.0761763	1.6708	1.28535e-05	0.925983	7.1236e-06	2004	-2.57471	-11.2619	-11.8521	-4.05974	0.000225191
33	129227	1654.6	0.0128038	199.211	0.00256387	9291	0.0718967	9841	0.0761528	1	7.73832e-06	2003	-2.63252	-2.57501	-11.7693	-4.35801	0.00270334
33	128453	1170.07	0.00910893	798.87	0.0182305	2102	0.016364	2869	0.022335	1	7.78495e-06	2002	-4.11267	-3.8016	-11.7633	-4.6985	0.0150075
33	127627	1040.21	0.00815039	145.95	0.00111972	2405	0.018844	2968	0.0232553	1	7.83533e-06	2001	-3.97156	-3.76122	-11.7569	-4.80969	0.00104608
34	134735	39130.9	0.290429	24372.1	0.186981	158928	1.17956	901.188	0.0066886	45.1	0.000334731	2011	0.165141	-5.00735	-8.00218	-1.2364	0.174684
34	134091	34033.4	0.253808	22584.1	0.471006	129624	0.966683	899.791	0.0067103	44.8578	0.000334533	2010	-0.0338846	-5.00411	-8.00278	-1.37118	0.472997
34	133450	28614.2	0.214419	19574.9	0.279293	149010	1.11659	932.99	0.00699131	45.169	0.000338471	2009	0.110284	-4.96309	-7.99107	-1.53983	0.293883
34	132802	26330.7	0.19827	18676.5	0.882555	181627	1.36765	1059.94	0.00798133	95	0.000715351	2008	0.313096	-4.83065	-7.24274	-1.61812	0.685245
34	132129	23608.1	0.178674	18474.6	0.44436	174796	1.32292	1147.12	0.00868181	71.6592	0.000542343	2007	0.279841	-4.74652	-7.51961	-1.72219	0.447085
34	131448	19647.7	0.149471	17416.9	0.043872	217145	1.65195	1204.1	0.00916028	54.783	0.000416765	2006	0.501954	-4.69288	-7.78299	-1.90065	0.0426398
34	130756	16670.5	0.127493	15802.5	0.174174	251145	1.92071	1167.17	0.00892631	49	0.000374744	2005	0.652697	-4.71875	-7.88927	-2.05969	0.318149
34	129988	12028.8	0.0925375	14578.4	0.019762	251565	1.93529	994.86	0.00765347	53.4941	0.000411531	2004	0.660259	-4.8726	-7.79563	-2.38014	0.019137
34	129227	2588.49	0.0200306	13276.9	0.170876	248773	1.92509	8619462	66.7002	73	0.000564897	2003	0.65497	4.20021	-7.47887	-3.9105	0.180171
34	128453	2194.35	0.0170829	11150.5	0.254459	209107	1.62789	7500892	58.3941	56	0.000435957	2002	0.487283	4.06721	-7.73797	-4.06968	0.209473
34	127627	1975.56	0.0154792	9727.44	0.0746282	222997	1.74726	7255415	56.8486	90	0.00070518	2001	0.558046	4.04039	-7.25706	-4.16826	0.06972
35	134735	2123.58	0.0157611	604.709	0.00463928	989	0.00734033	1.6452	1.22106e-05	0.0264	1.9594e-07	2011	-4.91437	-11.3132	-15.4455	-4.15021	0.00433417
35	134091	1769.37	0.0131953	650.11	0.0135585	1931.4	0.0144037	2.00915	1.49835e-05	0.0264	1.96881e-07	2010	-4.24027	-11.1086	-15.4407	-4.3279	0.0136158
35	133450	1409.37	0.010561	566.25	0.00807923	2013.13	0.0150853	2.33286	1.74812e-05	0.014	1.04908e-07	2009	-4.19404	-10.9544	-16.0702	-4.55059	0.00850129
35	132802	1179.29	0.00888005	634.6	0.0299879	2605	0.0196157	2.8162	2.1206e-05	0.524	3.94572e-06	2008	-3.93143	-10.7612	-12.4429	-4.72395	0.0232836
35	132129	819.375	0.00620133	616.404	0.0148261	2836.54	0.0214679	2.59333	1.96273e-05	0.524	3.96582e-06	2007	-3.8412	-10.8386	-12.4378	-5.08299	0.014917
35	131448	635.821	0.00483706	646.265	0.0016279	3278	0.0249376	2.1	1.59759e-05	0.1321	1.00496e-06	2006	-3.69138	-11.0444	-13.8106	-5.33145	0.00158218
35	130756	477.434	0.00365133	629.441	0.00693762	4099	0.0313485	1.882	1.43932e-05	0.15	1.14717e-06	2005	-3.46259	-11.1488	-13.6782	-5.61266	0.0126724
35	129988	384.041	0.00295443	535.751	0.000726246	3503	0.0269486	1.9402	1.4926e-05	0.1504	1.15703e-06	2004	-3.61382	-11.1124	-13.6697	-5.82445	0.000703276
35	129227	158.93	0.00122985	513.337	0.00660672	3895	0.0301408	28568	0.221068	0.15	1.16075e-06	2003	-3.50188	-1.50928	-13.6664	-6.70086	0.0069661
35	128453	141.96	0.00110515	547.72	0.0124991	3977	0.0309607	24593	0.191455	3	2.33548e-05	2002	-3.47504	-1.6531	-10.6647	-6.80777	0.0102894
35	127627	119.86	0.000939143	468.98	0.00359798	4207	0.0329632	26647	0.208788	4	3.13413e-05	2001	-3.41236	-1.56644	-10.3706	-6.97054	0.00336135
36	134735	846.893	0.00628562	1036.08	0.00794874	3559	0.0264148	0.4265	3.16547e-06	0.03328	2.47003e-07	2011	-3.63383	-12.6632	-15.2139	-5.06949	0.00742597
36	134091	840.58	0.00626873	970.36	0.0202375	31189.1	0.232597	0.20675	1.54186e-06	0.03328	2.4819e-07	2010	-1.45845	-13.3825	-15.2091	-5.07218	0.020323
36	133450	789.316	0.0059147	874.91	0.0124832	22919	0.171742	0.0457778	3.43033e-07	0.02634	1.97377e-07	2009	-1.76176	-14.8854	-15.4381	-5.13031	0.0131353
36	132802	734.379	0.00552988	834.111	0.0394158	27495	0.207038	0.0435	3.27555e-07	0.44	3.3132e-06	2008	-1.57486	-14.9316	-12.6176	-5.19759	0.0306038
36	132129	660.07	0.00499564	801.729	0.0192836	15931.7	0.120577	0.0307249	2.32537e-07	0.44	3.33008e-06	2007	-2.11547	-15.2742	-12.6125	-5.29919	0.0194019
36	131448	620.363	0.00471945	748.769	0.0018861	19747	0.150227	0.5	3.80379e-06	0.4417	3.36026e-06	2006	-1.89561	-12.4795	-12.6035	-5.35606	0.00183313
36	130756	534.631	0.00408877	690.999	0.0076161	18819	0.143925	0.5254	4.01817e-06	0.24	1.83548e-06	2005	-1.93847	-12.4247	-13.2082	-5.49951	0.0139117
36	129988	485.144	0.00373222	653.413	0.000885745	12600	0.096932	0.6573	5.05662e-06	0.2423	1.86402e-06	2004	-2.33375	-12.1948	-13.1928	-5.59075	0.00085773
36	129227	138.62	0.00107269	549.712	0.00707487	15783	0.122134	2754	0.0213113	1	7.73832e-06	2003	-2.10264	-3.84852	-11.7693	-6.83759	0.00745971
36	128453	124.9	0.00097234	543.83	0.0124104	9194	0.0715748	2892	0.0225141	1	7.78495e-06	2002	-2.63701	-3.79361	-11.7633	-6.9358	0.0102164
36	127627	111.64	0.000874737	572.94	0.00439555	10380	0.0813308	2633	0.0206304	2	1.56707e-05	2001	-2.50923	-3.88099	-11.0637	-7.04159	0.00410647
													1.16736			-0.493633
													-6.06622			-7.04159
